# Supplementary material for: Genes and Pathways Affecting Sheep Productivity Traits: Genetic Parameters, Genome-Wide Association Mapping, and Pathway Enrichment Analysis
Source: Front Genet. 2021 Jul 28;12:710613. doi: 10.3389/fgene.2021.710613 (PMC8355708; doi:10.3389/fgene.2021.710613)
Supplement: Supplementary Tables 1–6 — List of significantly (p ≤ 0.01) associated GO terms with the studied traits. [file Data_Sheet_1.xlsx]

## Sheet: Table S1
Table S1 Gene Ontology (GO) terms significantly (p ≤ 0.01) enriched using genes associated with progeny birth weight (PBW).
category	over_represented_pvalue	under_represented_pvalue	numDEInCat	numInCat	term	ontology
GO:0014069	2.36497e-06	0.999999	21	82	postsynaptic density	CC
GO:0000786	6.49332e-05	0.999988	12	40	nucleosome	CC
GO:0042734	9.62334e-05	0.999991	7	15	presynaptic membrane	CC
GO:0098685	0.000109953	0.999978	12	42	Schaffer collateral - CA1 synapse	CC
GO:0098978	0.000220956	0.999909	28	165	glutamatergic synapse	CC
GO:0051321	0.000559843	0.999926	7	19	meiotic cell cycle	BP
GO:0010001	0.000624378	0.999978	4	6	glial cell differentiation	BP
GO:0007010	0.000767823	0.999772	14	65	cytoskeleton organization	BP
GO:0098793	0.00112862	0.99969	12	53	presynapse	CC
GO:0030010	0.00119393	0.999895	5	11	establishment of cell polarity	BP
GO:0006816	0.00129831	0.999612	13	61	calcium ion transport	BP
GO:0045202	0.0013486	0.999424	23	141	synapse	CC
GO:0008237	0.00150837	0.999492	15	77	metallopeptidase activity	MF
GO:0098686	0.00182024	0.999749	6	17	hippocampal mossy fiber to CA3 synapse	CC
GO:0050804	0.00222872	0.999476	9	36	modulation of chemical synaptic transmission	BP
GO:0004222	0.00249231	0.999149	14	73	metalloendopeptidase activity	MF
GO:0005694	0.00249231	0.999149	14	73	chromosome	CC
GO:0007416	0.00253996	0.999619	6	18	synapse assembly	BP
GO:0006366	0.00270773	0.999216	11	51	transcription by RNA polymerase II	BP
GO:0005085	0.00288151	0.998954	15	82	guanyl-nucleotide exchange factor activity	MF
GO:0005635	0.00297995	0.999065	12	59	nuclear envelope	CC
GO:0031175	0.00297995	0.999065	12	59	neuron projection development	BP
GO:0060395	0.00343142	0.999327	7	25	SMAD protein signal transduction	BP
GO:0045746	0.00418767	0.999451	5	14	negative regulation of Notch signaling pathway	BP
GO:0043547	0.00431643	0.997923	24	163	positive regulation of GTPase activity	BP
GO:1901164	0.00505738	0.999777	3	5	negative regulation of trophoblast cell migration	BP
GO:2001223	0.00505738	0.999777	3	5	negative regulation of neuron migration	BP
GO:0051536	0.00547496	0.998812	7	27	iron-sulfur cluster binding	MF
GO:0043005	0.00598062	0.997822	13	72	neuron projection	CC
GO:0002092	0.00666091	0.999301	4	10	positive regulation of receptor internalization	BP
GO:0035774	0.00666091	0.999301	4	10	positive regulation of insulin secretion involved in cellular response to glucose stimulus	BP
GO:1990869	0.00666091	0.999301	4	10	cellular response to chemokine	BP
GO:0007155	0.00680843	0.99659	24	169	cell adhesion	BP
GO:0016477	0.00709605	0.99713	15	90	cell migration	BP
GO:0033138	0.00789054	0.997683	9	43	positive regulation of peptidyl-serine phosphorylation	BP
GO:0022008	0.00831489	0.998022	7	29	neurogenesis	BP
GO:0001222	0.00949038	0.999376	3	6	transcription corepressor binding	MF
GO:0002827	0.00949038	0.999376	3	6	positive regulation of T-helper 1 type immune response	BP
GO:0030140	0.00949038	0.999376	3	6	trans-Golgi network transport vesicle	CC
GO:0045334	0.00949038	0.999376	3	6	clathrin-coated endocytic vesicle	CC
GO:0003279	0.00978491	0.998806	4	11	cardiac septum development	BP
GO:0022011	0.00978491	0.998806	4	11	myelination in peripheral nervous system	BP

## Sheet: Table S2
Table S2 Gene Ontology (GO) terms significantly (p ≤ 0.01) enriched using genes associated with total litter weight at birth (TLWB).
category	over_represented_pvalue	under_represented_pvalue	numDEInCat	numInCat	term	ontology
GO:0098685	7.04576e-07	1	15	42	Schaffer collateral - CA1 synapse	CC
GO:0098978	1.48247e-05	0.999995	31	165	glutamatergic synapse	CC
GO:0000786	6.73796e-05	0.999987	12	40	nucleosome	CC
GO:0098793	8.09114e-05	0.999981	14	53	presynapse	CC
GO:0014069	0.000117175	0.999965	18	82	postsynaptic density	CC
GO:0046579	0.000199616	0.999985	6	12	positive regulation of Ras protein signal transduction	BP
GO:0099170	0.000226228	0.999996	4	5	postsynaptic modulation of chemical synaptic transmission	BP
GO:0045746	0.000560439	0.999943	6	14	negative regulation of Notch signaling pathway	BP
GO:0010001	0.000633589	0.999977	4	6	glial cell differentiation	BP
GO:0002092	0.000711427	0.999947	5	10	positive regulation of receptor internalization	BP
GO:0007010	0.000797106	0.999763	14	65	cytoskeleton organization	BP
GO:0042734	0.000868335	0.999901	6	15	presynaptic membrane	CC
GO:0005694	0.000884858	0.999719	15	73	chromosome	CC
GO:0030010	0.00121478	0.999893	5	11	establishment of cell polarity	BP
GO:0006816	0.00134408	0.999597	13	61	calcium ion transport	BP
GO:0045202	0.00141787	0.999392	23	141	synapse	CC
GO:2000114	0.00193989	0.9998	5	12	regulation of establishment of cell polarity	BP
GO:0050804	0.00228775	0.99946	9	36	modulation of chemical synaptic transmission	BP
GO:0007416	0.00258962	0.99961	6	18	synapse assembly	BP
GO:0006366	0.0027893	0.999189	11	51	transcription by RNA polymerase II	BP
GO:0016477	0.00298069	0.99887	16	90	cell migration	BP
GO:0035091	0.00325462	0.998907	13	67	phosphatidylinositol binding	MF
GO:0045111	0.00396847	0.999077	8	32	intermediate filament cytoskeleton	CC
GO:0003887	0.0042573	0.99944	5	14	DNA-directed DNA polymerase activity	MF
GO:0007269	0.0042573	0.99944	5	14	neurotransmitter secretion	BP
GO:0016079	0.0042573	0.99944	5	14	synaptic vesicle exocytosis	BP
GO:0048741	0.0042573	0.99944	5	14	skeletal muscle fiber development	BP
GO:0005088	0.00433579	0.999618	4	9	Ras guanyl-nucleotide exchange factor activity	MF
GO:0015934	0.00445658	0.999076	7	26	large ribosomal subunit	CC
GO:0007264	0.00470579	0.998427	12	62	small GTPase mediated signal transduction	BP
GO:0098982	0.00486184	0.998823	8	33	GABA-ergic synapse	CC
GO:0004693	0.00511271	0.999774	3	5	cyclin-dependent protein serine/threonine kinase activity	MF
GO:0009142	0.00511271	0.999774	3	5	nucleoside triphosphate biosynthetic process	BP
GO:0099527	0.00511271	0.999774	3	5	postsynapse to nucleus signaling pathway	BP
GO:1901164	0.00511271	0.999774	3	5	negative regulation of trophoblast cell migration	BP
GO:2000727	0.00511271	0.999774	3	5	positive regulation of cardiac muscle cell differentiation	BP
GO:2001223	0.00511271	0.999774	3	5	negative regulation of neuron migration	BP
GO:0004842	0.00665918	0.996851	21	141	ubiquitin-protein transferase activity	MF
GO:0032735	0.00675203	0.999289	4	10	positive regulation of interleukin-12 production	BP
GO:0035774	0.00675203	0.999289	4	10	positive regulation of insulin secretion involved in cellular response to glucose stimulus	BP
GO:0004222	0.00694922	0.997419	13	73	metalloendopeptidase activity	MF
GO:0007155	0.00712543	0.996417	24	169	cell adhesion	BP
GO:0005085	0.00761074	0.997012	14	82	guanyl-nucleotide exchange factor activity	MF
GO:0043408	0.00806998	0.998708	5	16	regulation of MAPK cascade	BP
GO:0043547	0.00896062	0.995474	23	163	positive regulation of GTPase activity	BP
GO:0001222	0.00959184	0.999366	3	6	transcription corepressor binding	MF
GO:0002827	0.00959184	0.999366	3	6	positive regulation of T-helper 1 type immune response	BP
GO:0019855	0.00959184	0.999366	3	6	calcium channel inhibitor activity	MF
GO:0098693	0.00959184	0.999366	3	6	regulation of synaptic vesicle cycle	BP
GO:0099509	0.00959184	0.999366	3	6	regulation of presynaptic cytosolic calcium ion concentration	BP
GO:1901222	0.00959184	0.999366	3	6	regulation of NIK/NF-kappaB signaling	BP
GO:0007626	0.00991865	0.996724	10	52	locomotory behavior	BP

## Sheet: Table S3
Table S3 Gene Ontology (GO) terms significantly (p ≤ 0.01) enriched using genes associated with litter mean weight at birth (LMWB).
category	over_represented_pvalue	under_represented_pvalue	numDEInCat	numInCat	term	ontology
GO:0042734	8.80509e-06	0.999999	8	15	presynaptic membrane	CC
GO:0060395	1.63576e-05	0.999998	10	25	SMAD protein signal transduction	BP
GO:0010001	2.2631e-05	1	5	6	glial cell differentiation	BP
GO:0000786	6.78784e-05	0.999987	12	40	nucleosome	CC
GO:0014069	0.000118308	0.999965	18	82	postsynaptic density	CC
GO:0045202	0.000252026	0.999901	25	141	synapse	CC
GO:0000226	0.000478381	0.999874	13	55	microtubule cytoskeleton organization	BP
GO:0008237	0.000534565	0.999832	16	77	metallopeptidase activity	MF
GO:0050804	0.000543437	0.999887	10	36	modulation of chemical synaptic transmission	BP
GO:0005096	0.00101411	0.999597	21	121	GTPase activator activity	MF
GO:0043547	0.0010224	0.999546	26	163	positive regulation of GTPase activity	BP
GO:0016477	0.00113906	0.999596	17	90	cell migration	BP
GO:0030010	0.00121898	0.999892	5	11	establishment of cell polarity	BP
GO:0098685	0.00198514	0.999495	10	42	Schaffer collateral - CA1 synapse	CC
GO:0045211	0.00200235	0.999446	11	49	postsynaptic membrane	CC
GO:0004222	0.00259924	0.999108	14	73	metalloendopeptidase activity	MF
GO:0005694	0.00259924	0.999108	14	73	chromosome	CC
GO:0098978	0.00261465	0.998773	25	165	glutamatergic synapse	CC
GO:0048593	0.00294683	0.999654	5	13	camera-type eye morphogenesis	BP
GO:0051321	0.00353383	0.999424	6	19	meiotic cell cycle	BP
GO:0006816	0.00412461	0.998647	12	61	calcium ion transport	BP
GO:0045746	0.00427133	0.999437	5	14	negative regulation of Notch signaling pathway	BP
GO:0016358	0.00469604	0.999178	6	20	dendrite development	BP
GO:0099527	0.00512383	0.999773	3	5	postsynapse to nucleus signaling pathway	BP
GO:1901164	0.00512383	0.999773	3	5	negative regulation of trophoblast cell migration	BP
GO:2001223	0.00512383	0.999773	3	5	negative regulation of neuron migration	BP
GO:0030424	0.00526427	0.997738	18	112	axon	CC
GO:0048786	0.00597107	0.999128	5	15	presynaptic active zone	CC
GO:0046982	0.0059979	0.996772	30	222	protein heterodimerization activity	MF
GO:0001764	0.00616901	0.997857	12	64	neuron migration	BP
GO:0002092	0.00677035	0.999286	4	10	positive regulation of receptor internalization	BP
GO:0035774	0.00677035	0.999286	4	10	positive regulation of insulin secretion involved in cellular response to glucose stimulus	BP
GO:1990869	0.00677035	0.999286	4	10	cellular response to chemokine	BP
GO:0007155	0.00719027	0.996382	24	169	cell adhesion	BP
GO:0005085	0.00765999	0.99699	14	82	guanyl-nucleotide exchange factor activity	MF
GO:0033138	0.00812226	0.997604	9	43	positive regulation of peptidyl-serine phosphorylation	BP
GO:0022008	0.0085193	0.997963	7	29	neurogenesis	BP
GO:0005635	0.00892979	0.996906	11	59	nuclear envelope	CC
GO:0001222	0.00961221	0.999365	3	6	transcription corepressor binding	MF
GO:0030140	0.00961221	0.999365	3	6	trans-Golgi network transport vesicle	CC
GO:0042277	0.00961221	0.999365	3	6	peptide binding	MF
GO:1901222	0.00961221	0.999365	3	6	regulation of NIK/NF-kappaB signaling	BP
GO:0050870	0.00994257	0.998781	4	11	positive regulation of T cell activation	BP
GO:0007626	0.00996914	0.996705	10	52	locomotory behavior	BP

## Sheet: Table S4
Table S4 Gene Ontology (GO) terms significantly (p ≤ 0.01) enriched using genes associated with progeny weaning weight (PWW).
category	over_represented_pvalue	under_represented_pvalue	numDEInCat	numInCat	term	ontology
GO:0030175	1.59135e-06	1	11	25	filopodium	CC
GO:0030163	6.50821e-05	0.999993	8	19	protein catabolic process	BP
GO:0007018	0.000318473	0.99992	13	54	microtubule-based movement	BP
GO:0050804	0.000455441	0.999907	10	36	modulation of chemical synaptic transmission	BP
GO:0043197	0.00046832	0.999915	9	30	dendritic spine	CC
GO:0005096	0.000763412	0.999704	21	121	GTPase activator activity	MF
GO:0046658	0.000774549	0.999914	6	15	anchored component of plasma membrane	CC
GO:0051965	0.00079105	0.999844	9	32	positive regulation of synapse assembly	BP
GO:0003777	0.000967178	0.999739	12	53	microtubule motor activity	MF
GO:0005911	0.00100425	0.999623	19	107	cell-cell junction	CC
GO:0042692	0.00127269	0.999934	4	7	muscle cell differentiation	BP
GO:0043087	0.00167643	0.999546	11	49	regulation of GTPase activity	BP
GO:0005868	0.00176172	0.999823	5	12	cytoplasmic dynein complex	CC
GO:0098978	0.00193971	0.999111	25	165	glutamatergic synapse	CC
GO:0016310	0.00234884	0.998777	33	241	phosphorylation	BP
GO:0060996	0.00238081	0.999835	4	8	dendritic spine development	BP
GO:0048593	0.00267132	0.999694	5	13	camera-type eye morphogenesis	BP
GO:0090316	0.00267132	0.999694	5	13	positive regulation of intracellular protein transport	BP
GO:0016485	0.00280553	0.999387	8	31	protein processing	BP
GO:0000790	0.0030269	0.998849	16	92	nuclear chromatin	CC
GO:0017048	0.00310605	0.999402	7	25	Rho GTPase binding	MF
GO:0007157	0.0038781	0.999501	5	14	heterophilic cell-cell adhesion via plasma membrane cell adhesion molecules	BP
GO:0000030	0.00400922	0.999655	4	9	mannosyltransferase activity	MF
GO:0045332	0.00400922	0.999655	4	9	phospholipid translocation	BP
GO:0016757	0.00418103	0.998244	18	112	transferase activity, transferring glycosyl groups	MF
GO:0030286	0.00420597	0.999281	6	20	dynein complex	CC
GO:0000722	0.00480774	0.999792	3	5	telomere maintenance via recombination	BP
GO:0030670	0.00480774	0.999792	3	5	phagocytic vesicle membrane	CC
GO:0060287	0.00480774	0.999792	3	5	epithelial cilium movement involved in determination of left/right asymmetry	BP
GO:0032956	0.00496865	0.998941	7	27	regulation of actin cytoskeleton organization	BP
GO:0051536	0.00496865	0.998941	7	27	iron-sulfur cluster binding	MF
GO:0003950	0.00542987	0.999225	5	15	NAD+ ADP-ribosyltransferase activity	MF
GO:0032007	0.00542987	0.999225	5	15	negative regulation of TOR signaling	BP
GO:0045211	0.00557027	0.998324	10	49	postsynaptic membrane	CC
GO:0010628	0.00570428	0.997014	28	207	positive regulation of gene expression	BP
GO:0008283	0.00633189	0.997569	14	82	cell proliferation	BP
GO:0042127	0.0067151	0.997299	15	91	regulation of cell proliferation	BP
GO:0004970	0.00737343	0.998846	5	16	ionotropic glutamate receptor activity	MF
GO:0019899	0.00788352	0.995996	24	174	enzyme binding	MF
GO:0032991	0.0081534	0.995279	35	281	protein-containing complex	CC
GO:0005777	0.00858375	0.997227	10	52	peroxisome	CC
GO:0001222	0.00903223	0.999417	3	6	transcription corepressor binding	MF
GO:0005587	0.00903223	0.999417	3	6	collagen type IV trimer	CC
GO:0016558	0.00903223	0.999417	3	6	protein import into peroxisome matrix	BP
GO:0042026	0.00903223	0.999417	3	6	protein refolding	BP
GO:0042755	0.00903223	0.999417	3	6	eating behavior	BP
GO:0044295	0.00903223	0.999417	3	6	axonal growth cone	CC
GO:0051930	0.00903223	0.999417	3	6	regulation of sensory perception of pain	BP
GO:0097502	0.00903223	0.999417	3	6	mannosylation	BP
GO:0060122	0.00919614	0.998898	4	11	inner ear receptor cell stereocilium organization	BP
GO:0015078	0.00975358	0.998339	5	17	proton transmembrane transporter activity	MF
GO:0032420	0.00975358	0.998339	5	17	stereocilium	CC
GO:0035235	0.00975358	0.998339	5	17	ionotropic glutamate receptor signaling pathway	BP
GO:0098609	0.00978397	0.996556	11	61	cell-cell adhesion	BP

## Sheet: Table S5
Table S5 Gene Ontology (GO) terms significantly (p ≤ 0.01) enriched using genes associated with total litter weight at weaning (TLWW).
category	over_represented_pvalue	under_represented_pvalue	numDEInCat	numInCat	term	ontology
GO:0005096	7.69038e-05	0.999973	24	121	GTPase activator activity	MF
GO:0046834	0.000424569	0.999974	5	9	lipid phosphorylation	BP
GO:0045184	0.000588485	0.999906	8	24	establishment of protein localization	BP
GO:0050804	0.000645265	0.999863	10	36	modulation of chemical synaptic transmission	BP
GO:0072659	0.00128786	0.999575	15	74	protein localization to plasma membrane	BP
GO:0043547	0.00139744	0.999366	26	163	positive regulation of GTPase activity	BP
GO:0016500	0.00150302	0.999918	4	7	protein-hormone receptor activity	MF
GO:0042788	0.00150302	0.999918	4	7	polysomal ribosome	CC
GO:0045779	0.00150302	0.999918	4	7	negative regulation of bone resorption	BP
GO:0098978	0.00167119	0.999231	26	165	glutamatergic synapse	CC
GO:0043565	0.00182834	0.999	40	291	sequence-specific DNA binding	MF
GO:0043087	0.00237875	0.999326	11	49	regulation of GTPase activity	BP
GO:0045947	0.00280303	0.999797	4	8	negative regulation of translational initiation	BP
GO:0019722	0.00290343	0.999552	6	18	calcium-mediated signaling	BP
GO:0043197	0.00295273	0.999353	8	30	dendritic spine	CC
GO:0003951	0.00324287	0.99961	5	13	NAD+ kinase activity	MF
GO:0090316	0.00324287	0.99961	5	13	positive regulation of intracellular protein transport	BP
GO:0016485	0.00368661	0.999157	8	31	protein processing	BP
GO:0005777	0.00389472	0.998813	11	52	peroxisome	CC
GO:0006874	0.00395893	0.998975	9	38	cellular calcium ion homeostasis	BP
GO:0030175	0.00397665	0.999199	7	25	filopodium	CC
GO:0005216	0.00412541	0.998099	22	141	ion channel activity	MF
GO:0008344	0.00455389	0.998915	8	32	adult locomotory behavior	BP
GO:0035024	0.00469301	0.999367	5	14	negative regulation of Rho protein signal transduction	BP
GO:0008299	0.00470581	0.999575	4	9	isoprenoid biosynthetic process	BP
GO:0045332	0.00470581	0.999575	4	9	phospholipid translocation	BP
GO:0048814	0.00470581	0.999575	4	9	regulation of dendrite morphogenesis	BP
GO:0035556	0.0051346	0.997271	30	215	intracellular signal transduction	BP
GO:0034220	0.00543031	0.997661	18	110	ion transmembrane transport	BP
GO:0000722	0.00545278	0.999753	3	5	telomere maintenance via recombination	BP
GO:0033625	0.00545278	0.999753	3	5	positive regulation of integrin activation	BP
GO:0045910	0.00545278	0.999753	3	5	negative regulation of DNA recombination	BP
GO:0051775	0.00545278	0.999753	3	5	response to redox state	BP
GO:0060074	0.00545278	0.999753	3	5	synapse maturation	BP
GO:0060287	0.00545278	0.999753	3	5	epithelial cilium movement involved in determination of left/right asymmetry	BP
GO:1904948	0.00545278	0.999753	3	5	midbrain dopaminergic neuron differentiation	BP
GO:0007264	0.00562689	0.998075	12	62	small GTPase mediated signal transduction	BP
GO:0034599	0.00631997	0.99859	7	27	cellular response to oxidative stress	BP
GO:0048705	0.00631997	0.99859	7	27	skeletal system morphogenesis	BP
GO:0046627	0.00731673	0.999211	4	10	negative regulation of insulin receptor signaling pathway	BP
GO:0006811	0.00784401	0.995516	34	259	ion transport	BP
GO:0042632	0.00810771	0.997837	8	35	cholesterol homeostasis	BP
GO:0004970	0.00886713	0.998547	5	16	ionotropic glutamate receptor activity	MF
GO:0007275	0.00908697	0.995972	17	107	multicellular organism development	BP

## Sheet: Table S6
Table S6 Gene Ontology (GO) terms significantly (p ≤ 0.01) enriched using genes associated litter mean weight at weaning (LMWW).
category	over_represented_pvalue	under_represented_pvalue	numDEInCat	numInCat	term	ontology
GO:0030175	9.60152e-05	0.999987	9	25	filopodium	CC
GO:0005096	0.000106775	0.999963	23	121	GTPase activator activity	MF
GO:0042127	0.000349378	0.999885	18	91	regulation of cell proliferation	BP
GO:0043087	0.0004472	0.999891	12	49	regulation of GTPase activity	BP
GO:0016485	0.000605615	0.999886	9	31	protein processing	BP
GO:0003777	0.000954109	0.999743	12	53	microtubule motor activity	MF
GO:0007018	0.00113708	0.999686	12	54	microtubule-based movement	BP
GO:0016310	0.00119116	0.9994	34	241	phosphorylation	BP
GO:0043547	0.00159832	0.999278	25	163	positive regulation of GTPase activity	BP
GO:0072659	0.00238283	0.99919	14	74	protein localization to plasma membrane	BP
GO:0048593	0.00265305	0.999696	5	13	camera-type eye morphogenesis	BP
GO:0005777	0.00273964	0.999204	11	52	peroxisome	CC
GO:0030163	0.00313534	0.999502	6	19	protein catabolic process	BP
GO:0019001	0.003852	0.999505	5	14	guanyl nucleotide binding	MF
GO:0098978	0.00397223	0.998101	24	165	glutamatergic synapse	CC
GO:0030286	0.00417366	0.999287	6	20	dynein complex	CC
GO:0060113	0.00478641	0.999793	3	5	inner ear receptor cell differentiation	BP
GO:0060287	0.00478641	0.999793	3	5	epithelial cilium movement involved in determination of left/right asymmetry	BP
GO:0090286	0.00478641	0.999793	3	5	cytoskeletal anchoring at nuclear membrane	BP
GO:0035556	0.00505976	0.997342	29	215	intracellular signal transduction	BP
GO:0046658	0.00539391	0.999232	5	15	anchored component of plasma membrane	CC
GO:0010628	0.00558707	0.99708	28	207	positive regulation of gene expression	BP
GO:0016301	0.00643074	0.996479	31	238	kinase activity	MF
GO:0004970	0.00732539	0.998855	5	16	ionotropic glutamate receptor activity	MF
GO:0031683	0.00732539	0.998855	5	16	G-protein beta/gamma-subunit complex binding	MF
GO:0000790	0.00733162	0.997019	15	92	nuclear chromatin	CC
GO:0019899	0.00774004	0.996075	24	174	enzyme binding	MF
GO:0032391	0.00880184	0.998186	6	23	photoreceptor connecting cilium	CC
GO:0016558	0.00899305	0.99942	3	6	protein import into peroxisome matrix	BP
GO:0030033	0.00899305	0.99942	3	6	microvillus assembly	BP
GO:0042026	0.00899305	0.99942	3	6	protein refolding	BP
GO:0051930	0.00899305	0.99942	3	6	regulation of sensory perception of pain	BP
GO:0005604	0.00972353	0.996793	10	53	basement membrane	CC
GO:0003774	0.010559	0.99603	12	70	motor activity	MF
GO:0050727	0.0109416	0.997618	6	24	regulation of inflammatory response	BP
GO:0006635	0.0125328	0.997697	5	18	fatty acid beta-oxidation	BP

## Sheet: Table S7
Table S7: Corrolation between the studied traits.
Corrolation between the original phenotypes.
	PBW	LMWB	TLWB	PWW	LMWW	TLWW
PBW	1
LMWB	0.162005	1
TLWB	-0.0403492	-0.0962943	1
PWW	0.028717	0.0925718	-0.0705312	1
LMWW	0.00483945	0.0134884	0.00963686	0.0271736	1
TLWW	0.0207383	-0.0124592	0.0472029	-0.0279193	0.0310357	1
Corrolation between the EBVs of traites.
	PBW	LMWB	TLWB	PWW	LMWW	TLWW
PBW	1
LMWB	0.991235	1
TLWB	0.980673	0.962336	1
PWW	0.158136	0.134331	0.133684	1
LMWW	0.355167	0.337323	0.352412	0.826201	1
TLWW	0.324375	0.29103	0.332739	0.796518	0.924668	1

## Sheet: Table S8
Table S8: Significant Genes used in GSEA for PBW trait.
Ensembel gene ID	Gene name
ENSOARG00000000040	ACBD3
ENSOARG00000000048	PIGS
ENSOARG00000000193	CADPS2
ENSOARG00000000223	DRAXIN
ENSOARG00000000229	NRG1
ENSOARG00000000252	SYTL5
ENSOARG00000000269	RASGEF1B
ENSOARG00000000270	ZFYVE1
ENSOARG00000000294	CACUL1
ENSOARG00000000302	POLR2C
ENSOARG00000000329	SRFBP1
ENSOARG00000000337	MAP3K5
ENSOARG00000000343	DOK4
ENSOARG00000000389	PGLYRP3
ENSOARG00000000406	PGLYRP4
ENSOARG00000000438	GRID1
ENSOARG00000000439	KIAA0556
ENSOARG00000000452	SNX31
ENSOARG00000000470	DCAF16
ENSOARG00000000484	ALDOC
ENSOARG00000000488	RPTOR
ENSOARG00000000512
ENSOARG00000000545	PRR16
ENSOARG00000000549	PTPRM
ENSOARG00000000803	MTCL1
ENSOARG00000000809	STAT5A
ENSOARG00000000823	ERI3
ENSOARG00000000859	SLC22A23
ENSOARG00000000952	SEC23B
ENSOARG00000000958	TMEM30B
ENSOARG00000001001	SPAG5
ENSOARG00000001112	SMIM26
ENSOARG00000001152
ENSOARG00000001158	LAT
ENSOARG00000001166	NRIP1
ENSOARG00000001174
ENSOARG00000001247	TRBV15
ENSOARG00000001386	SPNS1
ENSOARG00000001399	SLC24A3
ENSOARG00000001414	SUFU
ENSOARG00000001448	PNPLA6
ENSOARG00000001456	GFPT2
ENSOARG00000001467
ENSOARG00000001474	HIST3H2BB
ENSOARG00000001477	HIST3H2A
ENSOARG00000001488	HIST3H3
ENSOARG00000001491	ZBBX
ENSOARG00000001511	STAT3
ENSOARG00000001541	PEX3
ENSOARG00000001544	RIPK1
ENSOARG00000001555	NFATC2IP
ENSOARG00000001560	ARHGAP22
ENSOARG00000001591	FUCA2
ENSOARG00000001634	PHACTR2
ENSOARG00000001659	WDFY4
ENSOARG00000001662	DTWD2
ENSOARG00000001725	IMPA2
ENSOARG00000001727	DISP3
ENSOARG00000001733
ENSOARG00000001771	CAMSAP3
ENSOARG00000001793	AKR1A1
ENSOARG00000001813	NUP210L
ENSOARG00000001820
ENSOARG00000001874	UTRN
ENSOARG00000001903	PITPNB
ENSOARG00000001974	RNF130
ENSOARG00000001990	DRGX
ENSOARG00000002014
ENSOARG00000002015	XAB2
ENSOARG00000002066	PRDM11
ENSOARG00000002073	SHPRH
ENSOARG00000002087	PET100
ENSOARG00000002119	PCP2
ENSOARG00000002141	GRM1
ENSOARG00000002175	DNASE1
ENSOARG00000002202
ENSOARG00000002223	MYOF
ENSOARG00000002236	STXBP2
ENSOARG00000002243	SYT13
ENSOARG00000002256	TRAP1
ENSOARG00000002272	ADGB
ENSOARG00000002277
ENSOARG00000002291	RETN
ENSOARG00000002302	RAPGEF2
ENSOARG00000002319	PARG
ENSOARG00000002325
ENSOARG00000002345	SLC25A38
ENSOARG00000002356	RARRES1
ENSOARG00000002387	TRAPPC5
ENSOARG00000002412	CDH16
ENSOARG00000002441
ENSOARG00000002442	DIAPH2
ENSOARG00000002445	FCER2
ENSOARG00000002489	PREX2
ENSOARG00000002491
ENSOARG00000002494
ENSOARG00000002534
ENSOARG00000002548	UST
ENSOARG00000002590	SPP1
ENSOARG00000002625	ALPK1
ENSOARG00000002627	ATRN
ENSOARG00000002693	CNNM2
ENSOARG00000002748	NRXN3
ENSOARG00000002750	ZFAND4
ENSOARG00000002760	2021-03-08
ENSOARG00000002779	EDEM3
ENSOARG00000002800	UBE2Q1
ENSOARG00000002807	MED20
ENSOARG00000002819	ALOX5
ENSOARG00000002844	GRIA4
ENSOARG00000002845	PSTPIP2
ENSOARG00000002850
ENSOARG00000002858	OR13A1
ENSOARG00000002863	BYSL
ENSOARG00000002921	CHRNB2
ENSOARG00000002924	CCND3
ENSOARG00000002931	DOCK4
ENSOARG00000002991	CXCL12
ENSOARG00000003004	MND1
ENSOARG00000003012	PLEKHG1
ENSOARG00000003037	FARP1
ENSOARG00000003057
ENSOARG00000003069	C18orf25
ENSOARG00000003071	EYA3
ENSOARG00000003084	RTN3
ENSOARG00000003086	KCNK10
ENSOARG00000003103	FAT3
ENSOARG00000003122	SPATA7
ENSOARG00000003125
ENSOARG00000003131
ENSOARG00000003164
ENSOARG00000003188	CREB3L1
ENSOARG00000003189	INPP5F
ENSOARG00000003190	STK24
ENSOARG00000003207	XKR8
ENSOARG00000003209	AGAP3
ENSOARG00000003257	LGALS3BP
ENSOARG00000003291	DISC1
ENSOARG00000003298	EDDM13
ENSOARG00000003309	C11orf95
ENSOARG00000003324	LYZL4
ENSOARG00000003374	LRRN3
ENSOARG00000003379	EFCAB11
ENSOARG00000003400	RALGAPA2
ENSOARG00000003502	CHRNB3
ENSOARG00000003564	STIL
ENSOARG00000003569	KSR2
ENSOARG00000003572	RPS6KA5
ENSOARG00000003573	RNF2
ENSOARG00000003581	CMPK1
ENSOARG00000003585	ELMO1
ENSOARG00000003612	ABCC8
ENSOARG00000003675	HEATR1
ENSOARG00000003681	ZBTB7C
ENSOARG00000003688	NUP88
ENSOARG00000003726	HARBI1
ENSOARG00000003734	SLC50A1
ENSOARG00000003736	FAM184B
ENSOARG00000003747	KRTCAP2
ENSOARG00000003754	CTIF
ENSOARG00000003759
ENSOARG00000003769	TRIM46
ENSOARG00000003775	FOLH1
ENSOARG00000003788
ENSOARG00000003799	ATG13
ENSOARG00000003808	TRIM69
ENSOARG00000003845
ENSOARG00000003846	SLC5A9
ENSOARG00000003884
ENSOARG00000003894	THBS3
ENSOARG00000003915	SRGAP1
ENSOARG00000003952	NUCB2
ENSOARG00000003979	RABEP1
ENSOARG00000003983	KDM6A
ENSOARG00000004016	NCAPG
ENSOARG00000004021
ENSOARG00000004031	ATP6V0E1
ENSOARG00000004044	UBAC2
ENSOARG00000004073	PSD3
ENSOARG00000004089	CREBRF
ENSOARG00000004090
ENSOARG00000004096	BNIP1
ENSOARG00000004134	MED12L
ENSOARG00000004153	NKX2-5
ENSOARG00000004210	NOS1
ENSOARG00000004226	NRXN1
ENSOARG00000004249
ENSOARG00000004251
ENSOARG00000004252	ILVBL
ENSOARG00000004269	TOP2B
ENSOARG00000004273	CLRN1
ENSOARG00000004281	NEFH
ENSOARG00000004284	PLPP4
ENSOARG00000004305	FAF1
ENSOARG00000004333	LCORL
ENSOARG00000004357	NEURL1
ENSOARG00000004381	TMEM26
ENSOARG00000004404	SBNO1
ENSOARG00000004409	SYDE1
ENSOARG00000004453
ENSOARG00000004463
ENSOARG00000004468	THOC5
ENSOARG00000004541	CINP
ENSOARG00000004628
ENSOARG00000004684	RNF13
ENSOARG00000004702	LRP4
ENSOARG00000004706	FLOT2
ENSOARG00000004720
ENSOARG00000004731	CTNNA3
ENSOARG00000004737	CPQ
ENSOARG00000004741	LRRTM3
ENSOARG00000004789	HTR4
ENSOARG00000004809
ENSOARG00000004819	ARHGEF28
ENSOARG00000004848	ITGBL1
ENSOARG00000004860	DHRS13
ENSOARG00000004861	STXBP6
ENSOARG00000004874	FAM160A1
ENSOARG00000004925	MYPN
ENSOARG00000004967	DOK6
ENSOARG00000005004	FCHO2
ENSOARG00000005016	STXBP4
ENSOARG00000005021	C11orf49
ENSOARG00000005023	PHF12
ENSOARG00000005038	TNPO1
ENSOARG00000005121	AFAP1L1
ENSOARG00000005151	HMCN1
ENSOARG00000005183	DLG2
ENSOARG00000005190	ACTRT2
ENSOARG00000005218	EPCAM
ENSOARG00000005226	VPS16
ENSOARG00000005263	PLEKHA7
ENSOARG00000005282	ORC1
ENSOARG00000005292	CPA5
ENSOARG00000005303	ZNF567
ENSOARG00000005317	COG5
ENSOARG00000005325
ENSOARG00000005344	CPA1
ENSOARG00000005371	ST3GAL1
ENSOARG00000005373	PRPF38A
ENSOARG00000005436
ENSOARG00000005476	ALPK2
ENSOARG00000005494	TUT4
ENSOARG00000005515	PDPR
ENSOARG00000005525	MALT1
ENSOARG00000005537	PIGF
ENSOARG00000005541	ARHGEF37
ENSOARG00000005603	KHDRBS2
ENSOARG00000005624	BPIFB2
ENSOARG00000005650	ARHGEF10
ENSOARG00000005701	CPLX4
ENSOARG00000005733	CDK5RAP2
ENSOARG00000005740	BPIFB6
ENSOARG00000005768	ZNF397
ENSOARG00000005774	SLC9A9
ENSOARG00000005795	DTNA
ENSOARG00000005819	SOX6
ENSOARG00000005854	ADGRL3
ENSOARG00000005865	CD2BP2
ENSOARG00000005872	ASXL3
ENSOARG00000005911	INSC
ENSOARG00000005948
ENSOARG00000005969
ENSOARG00000005979	TBC1D10B
ENSOARG00000005981	PIGN
ENSOARG00000006008	KLHL14
ENSOARG00000006023	ERBIN
ENSOARG00000006035
ENSOARG00000006036
ENSOARG00000006048	RELCH
ENSOARG00000006063	EIF4EBP2
ENSOARG00000006065	NODAL
ENSOARG00000006069
ENSOARG00000006078	COL27A1
ENSOARG00000006116
ENSOARG00000006122	GAS7
ENSOARG00000006166	MLKL
ENSOARG00000006168
ENSOARG00000006181
ENSOARG00000006198	CPT2
ENSOARG00000006253	ANGPT2
ENSOARG00000006316	SDCCAG8
ENSOARG00000006372	LRRC6
ENSOARG00000006389
ENSOARG00000006414	DIAPH3
ENSOARG00000006428	GLIS1
ENSOARG00000006431	INSRR
ENSOARG00000006458	CWC27
ENSOARG00000006460	NTRK1
ENSOARG00000006517	PDE3B
ENSOARG00000006544	WNT3A
ENSOARG00000006551	DSG1
ENSOARG00000006557	AKAP6
ENSOARG00000006559
ENSOARG00000006582	KCNQ3
ENSOARG00000006617
ENSOARG00000006632
ENSOARG00000006643	RASA2
ENSOARG00000006650	FAM83B
ENSOARG00000006662	TMC2
ENSOARG00000006673	MYO6
ENSOARG00000006683
ENSOARG00000006689
ENSOARG00000006754	PALM3
ENSOARG00000006776
ENSOARG00000006780	KBTBD2
ENSOARG00000006797	CNMD
ENSOARG00000006812	HHLA1
ENSOARG00000006817
ENSOARG00000006823	SUGT1
ENSOARG00000006827	RBM19
ENSOARG00000006830	IL27RA
ENSOARG00000006860	TRIM42
ENSOARG00000006894
ENSOARG00000006911
ENSOARG00000006927	CDNF
ENSOARG00000006965	RLN3
ENSOARG00000007007	KCTD1
ENSOARG00000007060
ENSOARG00000007085	HSPA14
ENSOARG00000007187	BCKDHB
ENSOARG00000007202	SPON1
ENSOARG00000007210	PDE4D
ENSOARG00000007266	FKTN
ENSOARG00000007297
ENSOARG00000007302	UBE3D
ENSOARG00000007345	FNDC8
ENSOARG00000007369
ENSOARG00000007427
ENSOARG00000007449	ENOX1
ENSOARG00000007455	ADCY8
ENSOARG00000007462	DCAF15
ENSOARG00000007494	NME9
ENSOARG00000007498	PTH
ENSOARG00000007501	PRIMPOL
ENSOARG00000007510	TMEM61
ENSOARG00000007513	SYNPO
ENSOARG00000007527	RAD51D
ENSOARG00000007530	BSND
ENSOARG00000007555	ATP2B3
ENSOARG00000007558	GAS2
ENSOARG00000007559	PODNL1
ENSOARG00000007667	PRMT9
ENSOARG00000007686	ASAP1
ENSOARG00000007705
ENSOARG00000007711	CC2D1A
ENSOARG00000007742
ENSOARG00000007745	SIAH3
ENSOARG00000007791	VAT1L
ENSOARG00000007799
ENSOARG00000007805	ARL8B
ENSOARG00000007813	TRMT11
ENSOARG00000007815
ENSOARG00000007848
ENSOARG00000007874	GATAD2A
ENSOARG00000007878	NCOA7
ENSOARG00000007892
ENSOARG00000007916	WWOX
ENSOARG00000007919
ENSOARG00000007950	STMN2
ENSOARG00000007953	TMEM184C
ENSOARG00000007959	SPTBN2
ENSOARG00000007960
ENSOARG00000007969	CNTN5
ENSOARG00000007977	C1QB
ENSOARG00000007998	DGKB
ENSOARG00000008006	RNF217
ENSOARG00000008011	GALNT13
ENSOARG00000008053	ARL6IP6
ENSOARG00000008069	TEAD1
ENSOARG00000008094	EPHB1
ENSOARG00000008132	ITPR1
ENSOARG00000008134	SORCS3
ENSOARG00000008157	CABLES1
ENSOARG00000008188	ANXA6
ENSOARG00000008198	AGMO
ENSOARG00000008224	DAB1
ENSOARG00000008336	RCBTB2
ENSOARG00000008371	GPR85
ENSOARG00000008379	DBX1
ENSOARG00000008389	ITGA8
ENSOARG00000008420	HSD17B10
ENSOARG00000008450
ENSOARG00000008453	RIBC1
ENSOARG00000008455	ESCO1
ENSOARG00000008460	BRF1
ENSOARG00000008504	LRRC72
ENSOARG00000008579	ZNF827
ENSOARG00000008581	SMC1A
ENSOARG00000008607	BTBD6
ENSOARG00000008635	ANKMY2
ENSOARG00000008639
ENSOARG00000008648	MTMR2
ENSOARG00000008701	RNASEH2B
ENSOARG00000008709	SORCS1
ENSOARG00000008720	NIM1K
ENSOARG00000008729	ZNF131
ENSOARG00000008743	CNTN4
ENSOARG00000008753
ENSOARG00000008756	H6PD
ENSOARG00000008792	C13orf42
ENSOARG00000008794
ENSOARG00000008802	SSH2
ENSOARG00000008819	ROCK1
ENSOARG00000008823	FAM124A
ENSOARG00000008838	CNTN6
ENSOARG00000008860	NFIA
ENSOARG00000008885	NET1
ENSOARG00000008891	NTRK2
ENSOARG00000008929	RFX6
ENSOARG00000008932	ANO2
ENSOARG00000008939	WDFY2
ENSOARG00000008965	DHRS12
ENSOARG00000008971	KIF27
ENSOARG00000008988	PLCG2
ENSOARG00000008990	GKAP1
ENSOARG00000008998	PATJ
ENSOARG00000009006	NSRP1
ENSOARG00000009010	UBQLN1
ENSOARG00000009014	KPNA5
ENSOARG00000009024	IDNK
ENSOARG00000009032	SPARC
ENSOARG00000009068	RSU1
ENSOARG00000009084	RUNX1T1
ENSOARG00000009087	ZUP1
ENSOARG00000009089	SMAD1
ENSOARG00000009141
ENSOARG00000009163	KCNMA1
ENSOARG00000009196
ENSOARG00000009204
ENSOARG00000009214
ENSOARG00000009229
ENSOARG00000009236
ENSOARG00000009261	NUDT16
ENSOARG00000009288
ENSOARG00000009301	COLEC12
ENSOARG00000009306	DOCK7
ENSOARG00000009309	NEK11
ENSOARG00000009360
ENSOARG00000009362	SPTY2D1
ENSOARG00000009398
ENSOARG00000009408	UEVLD
ENSOARG00000009409	SNX13
ENSOARG00000009414	ATP2C1
ENSOARG00000009429	FANCM
ENSOARG00000009449
ENSOARG00000009451	HS3ST5
ENSOARG00000009452	EFCAB5
ENSOARG00000009479
ENSOARG00000009493	HDAC2
ENSOARG00000009496
ENSOARG00000009514	CCR9
ENSOARG00000009537	DUSP5
ENSOARG00000009554	CCL11
ENSOARG00000009595	CDKAL1
ENSOARG00000009613	PIWIL4
ENSOARG00000009615	BRWD1
ENSOARG00000009630	MLLT6
ENSOARG00000009641	HDAC9
ENSOARG00000009654	TGM5
ENSOARG00000009671	GTF2H1
ENSOARG00000009677	CISD3
ENSOARG00000009688
ENSOARG00000009689	TMCO4
ENSOARG00000009697	GADD45GIP1
ENSOARG00000009715	TGM7
ENSOARG00000009732	FYN
ENSOARG00000009763	PCGF2
ENSOARG00000009766	ADAMTS17
ENSOARG00000009767	HPS5
ENSOARG00000009769	TRAF3IP2
ENSOARG00000009773	RAD23A
ENSOARG00000009798	SAMD12
ENSOARG00000009831	PSMB3
ENSOARG00000009832	TRMT9B
ENSOARG00000009860	ROR1
ENSOARG00000009869
ENSOARG00000009870	CALR
ENSOARG00000009874	KCTD9
ENSOARG00000009889	GNRH1
ENSOARG00000009905	MBOAT1
ENSOARG00000009918	DOCK5
ENSOARG00000009924	ANXA11
ENSOARG00000009929	SLC45A1
ENSOARG00000009949	SKAP2
ENSOARG00000009954
ENSOARG00000009960	PAK5
ENSOARG00000009971	TMEM98
ENSOARG00000009973	EMILIN2
ENSOARG00000009979	DSCAM
ENSOARG00000009984	PLAC9
ENSOARG00000010007	OTUD6B
ENSOARG00000010026	ADAM28
ENSOARG00000010049
ENSOARG00000010080	SULF2
ENSOARG00000010081	LPIN2
ENSOARG00000010097	CLCN5
ENSOARG00000010136	EXOSC1
ENSOARG00000010152	ANKEF1
ENSOARG00000010155	RNF144B
ENSOARG00000010187	WDR70
ENSOARG00000010191	PEBP4
ENSOARG00000010220	ZDHHC16
ENSOARG00000010280	SORBS3
ENSOARG00000010286	DNAJC6
ENSOARG00000010313	TBRG1
ENSOARG00000010317	MKKS
ENSOARG00000010357	PIWIL2
ENSOARG00000010368
ENSOARG00000010370	SLX4IP
ENSOARG00000010384	PHYHIP
ENSOARG00000010405	BMP1
ENSOARG00000010431	CPLANE1
ENSOARG00000010436	MMS19
ENSOARG00000010437	DLGAP1
ENSOARG00000010444	CHRDL2
ENSOARG00000010452
ENSOARG00000010455	KLHL5
ENSOARG00000010466	CLIC5
ENSOARG00000010473	EPB41L3
ENSOARG00000010496	OSBPL3
ENSOARG00000010535
ENSOARG00000010555	STMN3
ENSOARG00000010584	RNF169
ENSOARG00000010595	LARS2
ENSOARG00000010622	YIPF4
ENSOARG00000010627	NBEA
ENSOARG00000010638	NLRC4
ENSOARG00000010646
ENSOARG00000010663	SLC30A6
ENSOARG00000010710	CALN1
ENSOARG00000010736	GSDME
ENSOARG00000010739	UPF1
ENSOARG00000010742	AGBL1
ENSOARG00000010762
ENSOARG00000010765	UAP1
ENSOARG00000010767
ENSOARG00000010788	R3HDM1
ENSOARG00000010797
ENSOARG00000010803	NBN
ENSOARG00000010808	TEAD4
ENSOARG00000010833
ENSOARG00000010841	DNAH11
ENSOARG00000010857	ZBTB7A
ENSOARG00000010890
ENSOARG00000010915	NPY
ENSOARG00000010930	CDCP1
ENSOARG00000010940
ENSOARG00000010952	ARHGEF6
ENSOARG00000010969	GPAM
ENSOARG00000010988	PIAS4
ENSOARG00000010998	COL15A1
ENSOARG00000011082	GABBR2
ENSOARG00000011083	IL23R
ENSOARG00000011088
ENSOARG00000011090	TRDMT1
ENSOARG00000011093
ENSOARG00000011098	PDP2
ENSOARG00000011108
ENSOARG00000011139	RNF141
ENSOARG00000011146	PADI2
ENSOARG00000011151	NRIP2
ENSOARG00000011164
ENSOARG00000011181
ENSOARG00000011187	ADD2
ENSOARG00000011188	MYH7B
ENSOARG00000011189	NUF2
ENSOARG00000011193	FOXE1
ENSOARG00000011227
ENSOARG00000011237
ENSOARG00000011253	HAPLN3
ENSOARG00000011256	ITFG2
ENSOARG00000011260	MFGE8
ENSOARG00000011270	ZFYVE27
ENSOARG00000011279	PHF13
ENSOARG00000011302	PSMD6
ENSOARG00000011315	SPEF2
ENSOARG00000011331	PREP
ENSOARG00000011340	MMP16
ENSOARG00000011342	ARRB1
ENSOARG00000011354	KLHL21
ENSOARG00000011408	FRY
ENSOARG00000011426	ZBTB48
ENSOARG00000011442	OFD1
ENSOARG00000011448	SLC2A4
ENSOARG00000011475	CNBD1
ENSOARG00000011482	GRHPR
ENSOARG00000011494
ENSOARG00000011497
ENSOARG00000011499
ENSOARG00000011501	GRIK2
ENSOARG00000011555
ENSOARG00000011562	YBX2
ENSOARG00000011588	BIRC7
ENSOARG00000011601	R3HCC1L
ENSOARG00000011614
ENSOARG00000011616
ENSOARG00000011627	ASCC3
ENSOARG00000011633	TTC23L
ENSOARG00000011639	YTHDF1
ENSOARG00000011645	STAM
ENSOARG00000011650	TMC7
ENSOARG00000011661	SORCS2
ENSOARG00000011668	SBF2
ENSOARG00000011692	LOXL4
ENSOARG00000011695	TRPC4AP
ENSOARG00000011719	LRRC7
ENSOARG00000011740	LIAS
ENSOARG00000011775	PRDM13
ENSOARG00000011780	ACTR3
ENSOARG00000011846	NTN4
ENSOARG00000011869	AMACR
ENSOARG00000011880	UGDH
ENSOARG00000011885	DPP10
ENSOARG00000011902	SLC45A2
ENSOARG00000011922	FAXC
ENSOARG00000011936	TRDV3
ENSOARG00000011950
ENSOARG00000011953	FANK1
ENSOARG00000011965	LMBRD1
ENSOARG00000011980
ENSOARG00000011993	ADAMTS12
ENSOARG00000012004
ENSOARG00000012013	MMP24
ENSOARG00000012045	KLHL32
ENSOARG00000012051	MTUS2
ENSOARG00000012075	CDON
ENSOARG00000012106	PIP5K1C
ENSOARG00000012113	UFL1
ENSOARG00000012147	NPR3
ENSOARG00000012148	MANEA
ENSOARG00000012172	ZNF330
ENSOARG00000012174	EIF6
ENSOARG00000012195	CCDC93
ENSOARG00000012203
ENSOARG00000012213	WDR13
ENSOARG00000012221	PDS5A
ENSOARG00000012241	ADAM12
ENSOARG00000012242	FAM83C
ENSOARG00000012245	MTMR12
ENSOARG00000012250	RBM3
ENSOARG00000012269	UQCC1
ENSOARG00000012284	NIPAL4
ENSOARG00000012289	MANBA
ENSOARG00000012294	C11orf65
ENSOARG00000012312	GOLPH3
ENSOARG00000012336	TLE4
ENSOARG00000012356	WNK1
ENSOARG00000012360	ELK3
ENSOARG00000012361	BACH2
ENSOARG00000012373	ADAM19
ENSOARG00000012387
ENSOARG00000012388
ENSOARG00000012403	FAM207A
ENSOARG00000012407	ERICH3
ENSOARG00000012441	RMDN1
ENSOARG00000012446
ENSOARG00000012452	ADARB1
ENSOARG00000012515	PCSK5
ENSOARG00000012534	FRMD7
ENSOARG00000012535	TNS3
ENSOARG00000012539
ENSOARG00000012552	OSTF1
ENSOARG00000012565	YPEL2
ENSOARG00000012566	ACOT7
ENSOARG00000012585
ENSOARG00000012595
ENSOARG00000012602	NUP42
ENSOARG00000012605	FBH1
ENSOARG00000012632	DHX40
ENSOARG00000012668	ANKRD6
ENSOARG00000012670	SLC26A8
ENSOARG00000012697
ENSOARG00000012707	MRPS6
ENSOARG00000012714	DDX10
ENSOARG00000012717	CLGN
ENSOARG00000012718	NFKB1
ENSOARG00000012723	MSH4
ENSOARG00000012729
ENSOARG00000012741	MAPKAP1
ENSOARG00000012755	GDA
ENSOARG00000012785	DCPS
ENSOARG00000012876	RBBP8NL
ENSOARG00000012908
ENSOARG00000012935	AK5
ENSOARG00000012949	C9orf135
ENSOARG00000012969	SLC24A4
ENSOARG00000012973	RALB
ENSOARG00000012989	CABLES2
ENSOARG00000012999	ZC3H12C
ENSOARG00000013013	SYN1
ENSOARG00000013062	SETD7
ENSOARG00000013089	CACNA1C
ENSOARG00000013116	CA3
ENSOARG00000013126	RPS21
ENSOARG00000013146	IL12B
ENSOARG00000013157	TIMP1
ENSOARG00000013158	SPDYC
ENSOARG00000013175	PLEKHS1
ENSOARG00000013216	PCDH15
ENSOARG00000013259	FUBP1
ENSOARG00000013286	RDX
ENSOARG00000013324
ENSOARG00000013349
ENSOARG00000013370	FDX1
ENSOARG00000013376	ARHGAP32
ENSOARG00000013378	GLIS3
ENSOARG00000013484	KIAA1211L
ENSOARG00000013499	ULK1
ENSOARG00000013511	FBXO25
ENSOARG00000013527	ADCY1
ENSOARG00000013534	MYOC
ENSOARG00000013542	TDRP
ENSOARG00000013551	ARHGAP20
ENSOARG00000013579
ENSOARG00000013596	COBL
ENSOARG00000013597	PSMB7
ENSOARG00000013606	ATP10B
ENSOARG00000013609
ENSOARG00000013617	PLXND1
ENSOARG00000013623	PPP3CA
ENSOARG00000013625	PRKG1
ENSOARG00000013658	TBC1D7
ENSOARG00000013661	NEK6
ENSOARG00000013726	AGK
ENSOARG00000013755	PTPRD
ENSOARG00000013756	ARHGAP12
ENSOARG00000013769
ENSOARG00000013817	RGN
ENSOARG00000013822
ENSOARG00000013843
ENSOARG00000013850	CRB2
ENSOARG00000013851	UNC79
ENSOARG00000013887	NFIB
ENSOARG00000013897	TNN
ENSOARG00000013905
ENSOARG00000013915	DENND11
ENSOARG00000013985
ENSOARG00000014001	GABRG2
ENSOARG00000014022
ENSOARG00000014058	LPAR3
ENSOARG00000014065	C11orf16
ENSOARG00000014107	ZNF438
ENSOARG00000014155	H1FOO
ENSOARG00000014158	AKIP1
ENSOARG00000014168	ASB2
ENSOARG00000014200
ENSOARG00000014225
ENSOARG00000014227	SUCO
ENSOARG00000014232	SERPINF1
ENSOARG00000014265
ENSOARG00000014279	RHO
ENSOARG00000014312	AJAP1
ENSOARG00000014319	DDAH1
ENSOARG00000014331
ENSOARG00000014337	DPF2
ENSOARG00000014343	SMYD4
ENSOARG00000014369	SVIL
ENSOARG00000014404	TTLL11
ENSOARG00000014407
ENSOARG00000014418	GRK4
ENSOARG00000014448	SIK2
ENSOARG00000014459	RDH8
ENSOARG00000014461	COL24A1
ENSOARG00000014470	IFT122
ENSOARG00000014484
ENSOARG00000014485	MTRR
ENSOARG00000014505
ENSOARG00000014516	NOP14
ENSOARG00000014542	TSPAN8
ENSOARG00000014548
ENSOARG00000014549	ODF2L
ENSOARG00000014575
ENSOARG00000014585
ENSOARG00000014588
ENSOARG00000014594
ENSOARG00000014615
ENSOARG00000014624	PPP2R1B
ENSOARG00000014650	HGH1
ENSOARG00000014651	MOB3B
ENSOARG00000014661	RNF144A
ENSOARG00000014686	TPH2
ENSOARG00000014701
ENSOARG00000014702	ADCY2
ENSOARG00000014745	PAPPA2
ENSOARG00000014773
ENSOARG00000014782	GLIPR1L2
ENSOARG00000014877	ADAMTS5
ENSOARG00000014879	TAF4
ENSOARG00000014899	ZDHHC17
ENSOARG00000014903	GRM3
ENSOARG00000014916	CSRP2
ENSOARG00000014926	ADGRD1
ENSOARG00000014930	SMAD5
ENSOARG00000014964
ENSOARG00000014996	NAV3
ENSOARG00000015005
ENSOARG00000015027	SYT1
ENSOARG00000015058	SH3KBP1
ENSOARG00000015081	TGFBI
ENSOARG00000015131	CDH4
ENSOARG00000015136	KLHL1
ENSOARG00000015139	ABLIM1
ENSOARG00000015209
ENSOARG00000015212	GLO1
ENSOARG00000015218
ENSOARG00000015285	TMTC2
ENSOARG00000015286	SEMA3A
ENSOARG00000015313	SPOCK1
ENSOARG00000015338
ENSOARG00000015354
ENSOARG00000015370	KLHL3
ENSOARG00000015375	ERC2
ENSOARG00000015398
ENSOARG00000015405	CAMK1D
ENSOARG00000015419
ENSOARG00000015446	ADAMTS16
ENSOARG00000015462	COQ10B
ENSOARG00000015472	C3H12orf29
ENSOARG00000015476	HSPD1
ENSOARG00000015513	KLF12
ENSOARG00000015522	MPPED2
ENSOARG00000015531	CEP290
ENSOARG00000015555	NCAM2
ENSOARG00000015556	OR8B4
ENSOARG00000015576
ENSOARG00000015585
ENSOARG00000015634	MARS2
ENSOARG00000015650	DPYS
ENSOARG00000015655	OCA2
ENSOARG00000015659	COMMD6
ENSOARG00000015680	ATP2B1
ENSOARG00000015774	DIP2C
ENSOARG00000015807	UNC13A
ENSOARG00000015828
ENSOARG00000015870	PAH
ENSOARG00000015926	TEX11
ENSOARG00000015941	HSPA4L
ENSOARG00000015979	RIMS2
ENSOARG00000015980	NR5A2
ENSOARG00000016001	CA8
ENSOARG00000016016	VEZT
ENSOARG00000016042	THY1
ENSOARG00000016064
ENSOARG00000016116	KIF14
ENSOARG00000016123	SEPTIN6
ENSOARG00000016138	CD5
ENSOARG00000016158
ENSOARG00000016163	TRBV16
ENSOARG00000016168	TRIB2
ENSOARG00000016172
ENSOARG00000016187	FNIP1
ENSOARG00000016206	TRBV19
ENSOARG00000016232
ENSOARG00000016264	VPS37C
ENSOARG00000016292	CACNA2D1
ENSOARG00000016295	NECTIN1
ENSOARG00000016310	RPAP2
ENSOARG00000016347	RAP1GDS1
ENSOARG00000016372	ART3
ENSOARG00000016403
ENSOARG00000016420
ENSOARG00000016492	AMHR2
ENSOARG00000016514	SP1
ENSOARG00000016523	CAMSAP2
ENSOARG00000016527	TDG
ENSOARG00000016547	CALCRL
ENSOARG00000016571
ENSOARG00000016578	VSNL1
ENSOARG00000016594	ASPH
ENSOARG00000016595	TMEM132D
ENSOARG00000016611	CXCL10
ENSOARG00000016640	GLT8D2
ENSOARG00000016641
ENSOARG00000016659	DCHS1
ENSOARG00000016685	CCDC18
ENSOARG00000016687	KIF6
ENSOARG00000016695	MVB12A
ENSOARG00000016749
ENSOARG00000016757	MINAR2
ENSOARG00000016786	KRT8
ENSOARG00000016796
ENSOARG00000016818	POC5
ENSOARG00000016819	POU2F3
ENSOARG00000016825	ADAMTS19
ENSOARG00000016880	OSR1
ENSOARG00000016884	CACNA1I
ENSOARG00000016899	TMEM132C
ENSOARG00000016923	PCSK2
ENSOARG00000016935	BCAR3
ENSOARG00000016967	KLHL15
ENSOARG00000016968	C11orf87
ENSOARG00000017013	PAIP2
ENSOARG00000017014	CLDN25
ENSOARG00000017027	ENTHD1
ENSOARG00000017032	OR2I1P
ENSOARG00000017050	SLC27A6
ENSOARG00000017065	SLC23A1
ENSOARG00000017072	TRPV5
ENSOARG00000017094	MZB1
ENSOARG00000017102
ENSOARG00000017118
ENSOARG00000017134	PDE7A
ENSOARG00000017152	ASCL3
ENSOARG00000017189	FBN2
ENSOARG00000017193	ARHGAP29
ENSOARG00000017200
ENSOARG00000017206	CFAP46
ENSOARG00000017222	FGF2
ENSOARG00000017240	HECW1
ENSOARG00000017251
ENSOARG00000017260	SMIM33
ENSOARG00000017265	TMEM173
ENSOARG00000017279	NLK
ENSOARG00000017295	HOMER1
ENSOARG00000017357
ENSOARG00000017375	HIPK3
ENSOARG00000017386	TRIM27
ENSOARG00000017434	CMYA5
ENSOARG00000017474	JUP
ENSOARG00000017475	INHBA
ENSOARG00000017497	KLHL29
ENSOARG00000017505	SUGCT
ENSOARG00000017507	TMPRSS12
ENSOARG00000017524	MAGI2
ENSOARG00000017547	USHBP1
ENSOARG00000017554	UBR5
ENSOARG00000017574	POLA1
ENSOARG00000017577	ING5
ENSOARG00000017587	PDCD1
ENSOARG00000017603
ENSOARG00000017613	SLC12A2
ENSOARG00000017630	NR2F6
ENSOARG00000017693
ENSOARG00000017698	POU6F2
ENSOARG00000017707	BRI3BP
ENSOARG00000017709	CAST
ENSOARG00000017717	SPG21
ENSOARG00000017721	OCEL1
ENSOARG00000017731	MTFMT
ENSOARG00000017760	CCDC192
ENSOARG00000017766	PRRC1
ENSOARG00000017767
ENSOARG00000017786	USE1
ENSOARG00000017797	FRYL
ENSOARG00000017815
ENSOARG00000017825	SGK3
ENSOARG00000017828
ENSOARG00000017856	MEGF10
ENSOARG00000017917	GRIK4
ENSOARG00000017919	SHTN1
ENSOARG00000017939	FTO
ENSOARG00000017950	TNRC6A
ENSOARG00000017981
ENSOARG00000018014	RRM2B
ENSOARG00000018023	SLC16A2
ENSOARG00000018027	IRX6
ENSOARG00000018039	BMP7
ENSOARG00000018080
ENSOARG00000018100	LIX1
ENSOARG00000018113	MEGF11
ENSOARG00000018126	IRS4
ENSOARG00000018149
ENSOARG00000018150	SLC6A2
ENSOARG00000018158
ENSOARG00000018163	RGMB
ENSOARG00000018185	MAP2K1
ENSOARG00000018198	SNAPC5
ENSOARG00000018207
ENSOARG00000018208	PHAX
ENSOARG00000018220	CPED1
ENSOARG00000018225	ZWILCH
ENSOARG00000018233
ENSOARG00000018246	PHF5A
ENSOARG00000018252	SLC18A2
ENSOARG00000018268
ENSOARG00000018272	ZW10
ENSOARG00000018279	LARGE1
ENSOARG00000018314	AGXT
ENSOARG00000018328	IQCH
ENSOARG00000018337	CPAMD8
ENSOARG00000018344	ALDH7A1
ENSOARG00000018353	MAP2K5
ENSOARG00000018354
ENSOARG00000018389	GSAP
ENSOARG00000018396	SCARB1
ENSOARG00000018428
ENSOARG00000018444	PDZD8
ENSOARG00000018454	ABTB2
ENSOARG00000018504	TPK1
ENSOARG00000018532
ENSOARG00000018543	NSFL1C
ENSOARG00000018561
ENSOARG00000018572	CDK6
ENSOARG00000018580	AASS
ENSOARG00000018589
ENSOARG00000018597
ENSOARG00000018604	GLCE
ENSOARG00000018623	ZNF608
ENSOARG00000018689	NUP93
ENSOARG00000018695	TLE3
ENSOARG00000018700	SCFD2
ENSOARG00000018732	UACA
ENSOARG00000018754
ENSOARG00000018765	LRRC49
ENSOARG00000018784
ENSOARG00000018811	VAV3
ENSOARG00000018871	CD47
ENSOARG00000018902
ENSOARG00000018918	SNX24
ENSOARG00000018940	SCLY
ENSOARG00000018967	CACNG2
ENSOARG00000019038	TAF13
ENSOARG00000019060	TMEM167B
ENSOARG00000019061	EPS15L1
ENSOARG00000019077	C1orf194
ENSOARG00000019101	MAP2
ENSOARG00000019122
ENSOARG00000019177
ENSOARG00000019188	IPO4
ENSOARG00000019194	REC8
ENSOARG00000019201	IRF9
ENSOARG00000019208	C1QTNF6
ENSOARG00000019256
ENSOARG00000019257
ENSOARG00000019289	SHISAL1
ENSOARG00000019332	CCDC80
ENSOARG00000019335
ENSOARG00000019379	BICD1
ENSOARG00000019388	CSMD2
ENSOARG00000019399	GPN1
ENSOARG00000019406	LRP10
ENSOARG00000019410	SUPT7L
ENSOARG00000019414	MMP14
ENSOARG00000019433	SLC16A4
ENSOARG00000019434	SLC4A1AP
ENSOARG00000019448	TRDC
ENSOARG00000019556	CCDC191
ENSOARG00000019565
ENSOARG00000019645	TMEM117
ENSOARG00000019717	ADAMTS20
ENSOARG00000019720	TMEM185B
ENSOARG00000019759
ENSOARG00000019784	AAK1
ENSOARG00000019818	MAGI3
ENSOARG00000019841	PHTF1
ENSOARG00000019845
ENSOARG00000019849	GKN1
ENSOARG00000019873	YRDC
ENSOARG00000019892	C1orf122
ENSOARG00000019896	MTF1
ENSOARG00000019900	FSTL1
ENSOARG00000019904	NDUFB4
ENSOARG00000019919
ENSOARG00000019957	GTF2E1
ENSOARG00000019977	STXBP5L
ENSOARG00000019980
ENSOARG00000019998	SLC2A13
ENSOARG00000019999	KRAS
ENSOARG00000020009	POLQ
ENSOARG00000020017	MEIS2
ENSOARG00000020021	CASC1
ENSOARG00000020044	RASGRP1
ENSOARG00000020046
ENSOARG00000020108	EHBP1
ENSOARG00000020110	SOX5
ENSOARG00000020111	PTPRR
ENSOARG00000020167	SLC49A4
ENSOARG00000020173	SEMA5B
ENSOARG00000020178	ST8SIA1
ENSOARG00000020184	PENK
ENSOARG00000020301
ENSOARG00000020304
ENSOARG00000020316	SLC51A
ENSOARG00000020318	PCYT1A
ENSOARG00000020330	EXD1
ENSOARG00000020336	CHP1
ENSOARG00000020346
ENSOARG00000020361	RTF1
ENSOARG00000020362
ENSOARG00000020376	TBX15
ENSOARG00000020379	RPAP1
ENSOARG00000020387	TYRO3
ENSOARG00000020391	AP1S3
ENSOARG00000020406	RIMKLA
ENSOARG00000020418	MAPKBP1
ENSOARG00000020428	DNAH6
ENSOARG00000020434
ENSOARG00000020437	DOCK10
ENSOARG00000020442	NOTCH2
ENSOARG00000020484	LPP
ENSOARG00000020558
ENSOARG00000020567	AGFG1
ENSOARG00000020570	ATOH8
ENSOARG00000020571	TTBK2
ENSOARG00000020593	PID1
ENSOARG00000020608	DNER
ENSOARG00000020629	ITGA10
ENSOARG00000020632	PEX11B
ENSOARG00000020676	RERG
ENSOARG00000020691	TRIM9
ENSOARG00000020697	GNB4
ENSOARG00000020719	TBL1XR1
ENSOARG00000020722	NAALADL2
ENSOARG00000020732	SPATA16
ENSOARG00000020737	NCEH1
ENSOARG00000020754	OTUD7B
ENSOARG00000020772	ANP32E
ENSOARG00000020783	C1orf54
ENSOARG00000020795	CIART
ENSOARG00000020796	MRPS21
ENSOARG00000020867	CGNL1
ENSOARG00000020878	MNS1
ENSOARG00000020882	TEX9
ENSOARG00000020918	UNC13C
ENSOARG00000021091	FBXO34
ENSOARG00000021098	TMEM260
ENSOARG00000021104
ENSOARG00000021117	DAAM1
ENSOARG00000021131	MNAT1
ENSOARG00000021134
ENSOARG00000021141	KCNH5
ENSOARG00000021142	RHOJ
ENSOARG00000021147	SYNE2
ENSOARG00000021366	U6
ENSOARG00000021391	U6
ENSOARG00000021409
ENSOARG00000021441	U3
ENSOARG00000021494
ENSOARG00000021511	SNORA70
ENSOARG00000021527	U6
ENSOARG00000021668
ENSOARG00000021803
ENSOARG00000021833	U4
ENSOARG00000021864	U6
ENSOARG00000021895	U6
ENSOARG00000021918	5S_rRNA
ENSOARG00000021934
ENSOARG00000021989
ENSOARG00000022004
ENSOARG00000022018
ENSOARG00000022023	U6
ENSOARG00000022038	U6
ENSOARG00000022110
ENSOARG00000022143
ENSOARG00000022161
ENSOARG00000022178
ENSOARG00000022332
ENSOARG00000022352
ENSOARG00000022379	U6
ENSOARG00000022397
ENSOARG00000022450	U6
ENSOARG00000022454	U6
ENSOARG00000022471	U6
ENSOARG00000022528
ENSOARG00000022567
ENSOARG00000022569	7SK
ENSOARG00000022585	U6
ENSOARG00000022661	SNORD16
ENSOARG00000022696
ENSOARG00000022742
ENSOARG00000022755
ENSOARG00000022773	U5
ENSOARG00000022784
ENSOARG00000022825
ENSOARG00000022839	SNORD18
ENSOARG00000022868
ENSOARG00000022912	U6
ENSOARG00000022926	MIR874
ENSOARG00000022938	oar-mir-133
ENSOARG00000022974
ENSOARG00000023046
ENSOARG00000023142	Vault
ENSOARG00000023212
ENSOARG00000023215	U6
ENSOARG00000023232
ENSOARG00000023427	U6
ENSOARG00000023512
ENSOARG00000023540
ENSOARG00000023634	U6
ENSOARG00000023637
ENSOARG00000023737
ENSOARG00000023744
ENSOARG00000023753	U6
ENSOARG00000023762
ENSOARG00000023908	U6
ENSOARG00000024204	5S_rRNA
ENSOARG00000024214
ENSOARG00000024283	U5
ENSOARG00000024310	SNORD18
ENSOARG00000024352	MIR490
ENSOARG00000024356	U1
ENSOARG00000024407
ENSOARG00000024434
ENSOARG00000024477	MIR340
ENSOARG00000024494
ENSOARG00000024495
ENSOARG00000024496
ENSOARG00000024527	SNORA72
ENSOARG00000024542	5S_rRNA
ENSOARG00000024599	U6
ENSOARG00000024600	7SK
ENSOARG00000024677	5S_rRNA
ENSOARG00000024706
ENSOARG00000024758	U6
ENSOARG00000024792
ENSOARG00000024799
ENSOARG00000024826	7SK
ENSOARG00000024836	SNORD18
ENSOARG00000024870
ENSOARG00000024885
ENSOARG00000024907	SNORA70
ENSOARG00000024980
ENSOARG00000025175	TOB2
ENSOARG00000025183
ENSOARG00000025202
ENSOARG00000025215
ENSOARG00000025222
ENSOARG00000025223
ENSOARG00000025242
ENSOARG00000025244
ENSOARG00000025264
ENSOARG00000025265
ENSOARG00000025266
ENSOARG00000025278
ENSOARG00000025279
ENSOARG00000025281
ENSOARG00000025282
ENSOARG00000025353
ENSOARG00000025364
ENSOARG00000025375
ENSOARG00000025384
ENSOARG00000025437
ENSOARG00000025438
ENSOARG00000025448
ENSOARG00000025449
ENSOARG00000025485
ENSOARG00000025488
ENSOARG00000025489
ENSOARG00000025494
ENSOARG00000025530
ENSOARG00000025536
ENSOARG00000025581
ENSOARG00000025676
ENSOARG00000025698
ENSOARG00000025723
ENSOARG00000025737
ENSOARG00000025741
ENSOARG00000025760
ENSOARG00000025762
ENSOARG00000025763
ENSOARG00000025765
ENSOARG00000025773
ENSOARG00000025895
ENSOARG00000025922
ENSOARG00000025957
ENSOARG00000025958
ENSOARG00000025975
ENSOARG00000026040
ENSOARG00000026069
ENSOARG00000026070
ENSOARG00000026095
ENSOARG00000026117
ENSOARG00000026151
ENSOARG00000026204
ENSOARG00000026240
ENSOARG00000026243
ENSOARG00000026245
ENSOARG00000026271
ENSOARG00000026273
ENSOARG00000026274
ENSOARG00000026284
ENSOARG00000026288
ENSOARG00000026292
ENSOARG00000026305
ENSOARG00000026306
ENSOARG00000026307
ENSOARG00000026308
ENSOARG00000026331
ENSOARG00000026349
ENSOARG00000026409
ENSOARG00000026415
ENSOARG00000026433
ENSOARG00000026453
ENSOARG00000026491
ENSOARG00000026494
ENSOARG00000026528
ENSOARG00000026582
ENSOARG00000026620
ENSOARG00000026653
ENSOARG00000026682
ENSOARG00000026686
ENSOARG00000026687
ENSOARG00000026695
ENSOARG00000026696
ENSOARG00000026713
ENSOARG00000026724
ENSOARG00000026727
ENSOARG00000026732
ENSOARG00000026737
ENSOARG00000026749
ENSOARG00000026777
ENSOARG00000026778
ENSOARG00000026782
ENSOARG00000026793
ENSOARG00000026813
ENSOARG00000026819
ENSOARG00000026822
ENSOARG00000026842
ENSOARG00000026872
ENSOARG00000026875
ENSOARG00000026909
ENSOARG00000026955
ENSOARG00000026969
ENSOARG00000026984
ENSOARG00000027021

## Sheet: Table S9
Table S9: Significant Genes used in GSEA for TLWB trait.
Ensembel gene ID	Gene name
ENSOARG00000000040	ACBD3
ENSOARG00000000048	PIGS
ENSOARG00000000147	ZNF282
ENSOARG00000000174	LRIT2
ENSOARG00000000193	CADPS2
ENSOARG00000000209	LRIT1
ENSOARG00000000223	DRAXIN
ENSOARG00000000229	NRG1
ENSOARG00000000243	RGR
ENSOARG00000000269	RASGEF1B
ENSOARG00000000270	ZFYVE1
ENSOARG00000000294	CACUL1
ENSOARG00000000302	POLR2C
ENSOARG00000000329	SRFBP1
ENSOARG00000000343	DOK4
ENSOARG00000000452	SNX31
ENSOARG00000000470	DCAF16
ENSOARG00000000484	ALDOC
ENSOARG00000000549	PTPRM
ENSOARG00000000571	RHOH
ENSOARG00000000725	MAP3K20
ENSOARG00000000759	KLF17
ENSOARG00000000776	NRK
ENSOARG00000000783	REM1
ENSOARG00000000803	MTCL1
ENSOARG00000000809	STAT5A
ENSOARG00000000823	ERI3
ENSOARG00000000859	SLC22A23
ENSOARG00000000941
ENSOARG00000000958	TMEM30B
ENSOARG00000001001	SPAG5
ENSOARG00000001014	PDK1
ENSOARG00000001158	LAT
ENSOARG00000001174
ENSOARG00000001247	TRBV15
ENSOARG00000001326	ATP6AP2
ENSOARG00000001359	DDHD2
ENSOARG00000001386	SPNS1
ENSOARG00000001430	PLPP5
ENSOARG00000001447	NSD3
ENSOARG00000001448	PNPLA6
ENSOARG00000001456	GFPT2
ENSOARG00000001467
ENSOARG00000001474	HIST3H2BB
ENSOARG00000001477	HIST3H2A
ENSOARG00000001488	HIST3H3
ENSOARG00000001491	ZBBX
ENSOARG00000001511	STAT3
ENSOARG00000001555	NFATC2IP
ENSOARG00000001560	ARHGAP22
ENSOARG00000001634	PHACTR2
ENSOARG00000001659	WDFY4
ENSOARG00000001725	IMPA2
ENSOARG00000001727	DISP3
ENSOARG00000001733
ENSOARG00000001754	MDFIC
ENSOARG00000001793	AKR1A1
ENSOARG00000001813	NUP210L
ENSOARG00000001820
ENSOARG00000001903	PITPNB
ENSOARG00000001920
ENSOARG00000001974	RNF130
ENSOARG00000001975
ENSOARG00000001985	OLFM1
ENSOARG00000001990	DRGX
ENSOARG00000002059
ENSOARG00000002066	PRDM11
ENSOARG00000002073	SHPRH
ENSOARG00000002106	TTC28
ENSOARG00000002141	GRM1
ENSOARG00000002149	SND1
ENSOARG00000002202
ENSOARG00000002223	MYOF
ENSOARG00000002243	SYT13
ENSOARG00000002277
ENSOARG00000002291	RETN
ENSOARG00000002302	RAPGEF2
ENSOARG00000002319	PARG
ENSOARG00000002325
ENSOARG00000002345	SLC25A38
ENSOARG00000002353	LRRC4
ENSOARG00000002354	ZMAT4
ENSOARG00000002356	RARRES1
ENSOARG00000002387	TRAPPC5
ENSOARG00000002412	CDH16
ENSOARG00000002441
ENSOARG00000002445	FCER2
ENSOARG00000002486	RRAD
ENSOARG00000002489	PREX2
ENSOARG00000002491
ENSOARG00000002494
ENSOARG00000002534
ENSOARG00000002536	CIAO2B
ENSOARG00000002539	MYRIP
ENSOARG00000002548	UST
ENSOARG00000002590	SPP1
ENSOARG00000002620	CES2
ENSOARG00000002693	CNNM2
ENSOARG00000002743	STX8
ENSOARG00000002748	NRXN3
ENSOARG00000002760	2021-03-08
ENSOARG00000002779	EDEM3
ENSOARG00000002800	UBE2Q1
ENSOARG00000002802	DIO2
ENSOARG00000002807	MED20
ENSOARG00000002819	ALOX5
ENSOARG00000002835	IPO5
ENSOARG00000002844	GRIA4
ENSOARG00000002845	PSTPIP2
ENSOARG00000002850
ENSOARG00000002858	OR13A1
ENSOARG00000002863	BYSL
ENSOARG00000002921	CHRNB2
ENSOARG00000002924	CCND3
ENSOARG00000002931	DOCK4
ENSOARG00000002984	CFAP52
ENSOARG00000002991	CXCL12
ENSOARG00000003004	MND1
ENSOARG00000003012	PLEKHG1
ENSOARG00000003040	C4orf45
ENSOARG00000003051	LEMD3
ENSOARG00000003057
ENSOARG00000003069	C18orf25
ENSOARG00000003084	RTN3
ENSOARG00000003086	KCNK10
ENSOARG00000003103	FAT3
ENSOARG00000003119	CPLX3
ENSOARG00000003122	SPATA7
ENSOARG00000003125
ENSOARG00000003131
ENSOARG00000003140	USP43
ENSOARG00000003153	LMAN1L
ENSOARG00000003164
ENSOARG00000003188	CREB3L1
ENSOARG00000003189	INPP5F
ENSOARG00000003190	STK24
ENSOARG00000003209	AGAP3
ENSOARG00000003249	CSK
ENSOARG00000003257	LGALS3BP
ENSOARG00000003291	DISC1
ENSOARG00000003298	EDDM13
ENSOARG00000003309	C11orf95
ENSOARG00000003324	LYZL4
ENSOARG00000003339	RASSF3
ENSOARG00000003353	PPP2R2B
ENSOARG00000003374	LRRN3
ENSOARG00000003379	EFCAB11
ENSOARG00000003451	SLC20A2
ENSOARG00000003460	SMIM19
ENSOARG00000003502	CHRNB3
ENSOARG00000003519	TTC7B
ENSOARG00000003564	STIL
ENSOARG00000003569	KSR2
ENSOARG00000003573	RNF2
ENSOARG00000003581	CMPK1
ENSOARG00000003585	ELMO1
ENSOARG00000003612	ABCC8
ENSOARG00000003681	ZBTB7C
ENSOARG00000003688	NUP88
ENSOARG00000003709	KLHL40
ENSOARG00000003726	HARBI1
ENSOARG00000003734	SLC50A1
ENSOARG00000003736	FAM184B
ENSOARG00000003747	KRTCAP2
ENSOARG00000003754	CTIF
ENSOARG00000003757	HHATL
ENSOARG00000003759
ENSOARG00000003769	TRIM46
ENSOARG00000003775	FOLH1
ENSOARG00000003788
ENSOARG00000003799	ATG13
ENSOARG00000003808	TRIM69
ENSOARG00000003823
ENSOARG00000003846	SLC5A9
ENSOARG00000003898	SH3PXD2B
ENSOARG00000003915	SRGAP1
ENSOARG00000003976	SH2D4A
ENSOARG00000003979	RABEP1
ENSOARG00000004016	NCAPG
ENSOARG00000004021
ENSOARG00000004024	RPL26L1
ENSOARG00000004031	ATP6V0E1
ENSOARG00000004044	UBAC2
ENSOARG00000004073	PSD3
ENSOARG00000004089	CREBRF
ENSOARG00000004090
ENSOARG00000004210	NOS1
ENSOARG00000004226	NRXN1
ENSOARG00000004249
ENSOARG00000004251
ENSOARG00000004252	ILVBL
ENSOARG00000004269	TOP2B
ENSOARG00000004273	CLRN1
ENSOARG00000004281	NEFH
ENSOARG00000004284	PLPP4
ENSOARG00000004305	FAF1
ENSOARG00000004333	LCORL
ENSOARG00000004340	FSHR
ENSOARG00000004357	NEURL1
ENSOARG00000004375	AHCYL2
ENSOARG00000004376	FLRT1
ENSOARG00000004404	SBNO1
ENSOARG00000004409	SYDE1
ENSOARG00000004442	PCCA
ENSOARG00000004453
ENSOARG00000004456	ERAL1
ENSOARG00000004468	THOC5
ENSOARG00000004490	STRIP2
ENSOARG00000004565	USP15
ENSOARG00000004606	COL22A1
ENSOARG00000004639	KLHL8
ENSOARG00000004647	ZNF385D
ENSOARG00000004702	LRP4
ENSOARG00000004704	LRIG3
ENSOARG00000004706	FLOT2
ENSOARG00000004731	CTNNA3
ENSOARG00000004732	DCC
ENSOARG00000004737	CPQ
ENSOARG00000004741	LRRTM3
ENSOARG00000004779	HSD17B11
ENSOARG00000004782
ENSOARG00000004809
ENSOARG00000004819	ARHGEF28
ENSOARG00000004843	C1GALT1
ENSOARG00000004848	ITGBL1
ENSOARG00000004857
ENSOARG00000004860	DHRS13
ENSOARG00000004861	STXBP6
ENSOARG00000004874	FAM160A1
ENSOARG00000004883	STN1
ENSOARG00000004950	KLHDC10
ENSOARG00000004967	DOK6
ENSOARG00000004996
ENSOARG00000005004	FCHO2
ENSOARG00000005010	TPP2
ENSOARG00000005016	STXBP4
ENSOARG00000005021	C11orf49
ENSOARG00000005023	PHF12
ENSOARG00000005038	TNPO1
ENSOARG00000005121	AFAP1L1
ENSOARG00000005149	KCNIP4
ENSOARG00000005151	HMCN1
ENSOARG00000005183	DLG2
ENSOARG00000005190	ACTRT2
ENSOARG00000005282	ORC1
ENSOARG00000005292	CPA5
ENSOARG00000005303	ZNF567
ENSOARG00000005325
ENSOARG00000005344	CPA1
ENSOARG00000005371	ST3GAL1
ENSOARG00000005373	PRPF38A
ENSOARG00000005436
ENSOARG00000005448	EFNB2
ENSOARG00000005476	ALPK2
ENSOARG00000005494	TUT4
ENSOARG00000005515	PDPR
ENSOARG00000005525	MALT1
ENSOARG00000005541	ARHGEF37
ENSOARG00000005603	KHDRBS2
ENSOARG00000005607	MMP27
ENSOARG00000005624	BPIFB2
ENSOARG00000005701	CPLX4
ENSOARG00000005724
ENSOARG00000005740	BPIFB6
ENSOARG00000005754	MEOX1
ENSOARG00000005768	ZNF397
ENSOARG00000005770	KIF1B
ENSOARG00000005795	DTNA
ENSOARG00000005819	SOX6
ENSOARG00000005854	ADGRL3
ENSOARG00000005865	CD2BP2
ENSOARG00000005872	ASXL3
ENSOARG00000005911	INSC
ENSOARG00000005937	MAST4
ENSOARG00000005948
ENSOARG00000005969
ENSOARG00000005979	TBC1D10B
ENSOARG00000006023	ERBIN
ENSOARG00000006036
ENSOARG00000006043	LRRC20
ENSOARG00000006049	MCUB
ENSOARG00000006063	EIF4EBP2
ENSOARG00000006065	NODAL
ENSOARG00000006069
ENSOARG00000006078	COL27A1
ENSOARG00000006122	GAS7
ENSOARG00000006131	KIF5A
ENSOARG00000006166	MLKL
ENSOARG00000006181
ENSOARG00000006253	ANGPT2
ENSOARG00000006299
ENSOARG00000006304	DCTN2
ENSOARG00000006316	SDCCAG8
ENSOARG00000006357	NUBPL
ENSOARG00000006388
ENSOARG00000006389
ENSOARG00000006414	DIAPH3
ENSOARG00000006428	GLIS1
ENSOARG00000006431	INSRR
ENSOARG00000006458	CWC27
ENSOARG00000006460	NTRK1
ENSOARG00000006471	DSG3
ENSOARG00000006514	FRMD4A
ENSOARG00000006517	PDE3B
ENSOARG00000006544	WNT3A
ENSOARG00000006551	DSG1
ENSOARG00000006559
ENSOARG00000006617
ENSOARG00000006628
ENSOARG00000006632
ENSOARG00000006643	RASA2
ENSOARG00000006650	FAM83B
ENSOARG00000006662	TMC2
ENSOARG00000006673	MYO6
ENSOARG00000006683
ENSOARG00000006689
ENSOARG00000006754	PALM3
ENSOARG00000006762	ZNF318
ENSOARG00000006776
ENSOARG00000006797	CNMD
ENSOARG00000006823	SUGT1
ENSOARG00000006830	IL27RA
ENSOARG00000006894
ENSOARG00000006899	PHIP
ENSOARG00000006911
ENSOARG00000006936	ABCC10
ENSOARG00000006965	RLN3
ENSOARG00000007007	KCTD1
ENSOARG00000007045	TAF4B
ENSOARG00000007060
ENSOARG00000007104	DLK2
ENSOARG00000007151	TTK
ENSOARG00000007187	BCKDHB
ENSOARG00000007202	SPON1
ENSOARG00000007302	UBE3D
ENSOARG00000007345	FNDC8
ENSOARG00000007427
ENSOARG00000007449	ENOX1
ENSOARG00000007455	ADCY8
ENSOARG00000007462	DCAF15
ENSOARG00000007473
ENSOARG00000007498	PTH
ENSOARG00000007501	PRIMPOL
ENSOARG00000007510	TMEM61
ENSOARG00000007513	SYNPO
ENSOARG00000007527	RAD51D
ENSOARG00000007530	BSND
ENSOARG00000007555	ATP2B3
ENSOARG00000007558	GAS2
ENSOARG00000007559	PODNL1
ENSOARG00000007610	GTF2F2
ENSOARG00000007686	ASAP1
ENSOARG00000007694	LAMA3
ENSOARG00000007705
ENSOARG00000007711	CC2D1A
ENSOARG00000007745	SIAH3
ENSOARG00000007754	SNX25
ENSOARG00000007778	ANO5
ENSOARG00000007791	VAT1L
ENSOARG00000007799
ENSOARG00000007805	ARL8B
ENSOARG00000007813	TRMT11
ENSOARG00000007815
ENSOARG00000007848
ENSOARG00000007874	GATAD2A
ENSOARG00000007877	FYB2
ENSOARG00000007878	NCOA7
ENSOARG00000007892
ENSOARG00000007916	WWOX
ENSOARG00000007919
ENSOARG00000007935	PLA2G4A
ENSOARG00000007950	STMN2
ENSOARG00000007959	SPTBN2
ENSOARG00000007960
ENSOARG00000007969	CNTN5
ENSOARG00000007998	DGKB
ENSOARG00000008006	RNF217
ENSOARG00000008011	GALNT13
ENSOARG00000008053	ARL6IP6
ENSOARG00000008072
ENSOARG00000008094	EPHB1
ENSOARG00000008132	ITPR1
ENSOARG00000008134	SORCS3
ENSOARG00000008157	CABLES1
ENSOARG00000008188	ANXA6
ENSOARG00000008198	AGMO
ENSOARG00000008224	DAB1
ENSOARG00000008311	MIB1
ENSOARG00000008336	RCBTB2
ENSOARG00000008368	CENPF
ENSOARG00000008371	GPR85
ENSOARG00000008379	DBX1
ENSOARG00000008389	ITGA8
ENSOARG00000008408	MAN1A1
ENSOARG00000008420	HSD17B10
ENSOARG00000008434	ABHD3
ENSOARG00000008450
ENSOARG00000008453	RIBC1
ENSOARG00000008455	ESCO1
ENSOARG00000008460	BRF1
ENSOARG00000008461	HABP4
ENSOARG00000008504	LRRC72
ENSOARG00000008537	NAV2
ENSOARG00000008539	GREB1L
ENSOARG00000008581	SMC1A
ENSOARG00000008583	CACNA1A
ENSOARG00000008607	BTBD6
ENSOARG00000008635	ANKMY2
ENSOARG00000008639
ENSOARG00000008648	MTMR2
ENSOARG00000008652	ETHE1
ENSOARG00000008686
ENSOARG00000008701	RNASEH2B
ENSOARG00000008709	SORCS1
ENSOARG00000008717	XRCC1
ENSOARG00000008720	NIM1K
ENSOARG00000008729	ZNF131
ENSOARG00000008743	CNTN4
ENSOARG00000008756	H6PD
ENSOARG00000008768
ENSOARG00000008794
ENSOARG00000008802	SSH2
ENSOARG00000008819	ROCK1
ENSOARG00000008838	CNTN6
ENSOARG00000008860	NFIA
ENSOARG00000008891	NTRK2
ENSOARG00000008929	RFX6
ENSOARG00000008930	RIF1
ENSOARG00000008939	WDFY2
ENSOARG00000008962
ENSOARG00000008965	DHRS12
ENSOARG00000008971	KIF27
ENSOARG00000008988	PLCG2
ENSOARG00000008998	PATJ
ENSOARG00000009006	NSRP1
ENSOARG00000009014	KPNA5
ENSOARG00000009032	SPARC
ENSOARG00000009068	RSU1
ENSOARG00000009081	NUP205
ENSOARG00000009084	RUNX1T1
ENSOARG00000009087	ZUP1
ENSOARG00000009103	NMI
ENSOARG00000009163	KCNMA1
ENSOARG00000009195	PLCB1
ENSOARG00000009196
ENSOARG00000009204
ENSOARG00000009214
ENSOARG00000009229
ENSOARG00000009236
ENSOARG00000009288
ENSOARG00000009301	COLEC12
ENSOARG00000009306	DOCK7
ENSOARG00000009330	LYPD6
ENSOARG00000009339	SLC43A3
ENSOARG00000009352	CLUL1
ENSOARG00000009360
ENSOARG00000009362	SPTY2D1
ENSOARG00000009398
ENSOARG00000009408	UEVLD
ENSOARG00000009414	ATP2C1
ENSOARG00000009449
ENSOARG00000009451	HS3ST5
ENSOARG00000009452	EFCAB5
ENSOARG00000009456	MXI1
ENSOARG00000009479
ENSOARG00000009493	HDAC2
ENSOARG00000009496
ENSOARG00000009537	DUSP5
ENSOARG00000009554	CCL11
ENSOARG00000009595	CDKAL1
ENSOARG00000009613	PIWIL4
ENSOARG00000009630	MLLT6
ENSOARG00000009641	HDAC9
ENSOARG00000009671	GTF2H1
ENSOARG00000009677	CISD3
ENSOARG00000009688
ENSOARG00000009697	GADD45GIP1
ENSOARG00000009709	C8orf48
ENSOARG00000009732	FYN
ENSOARG00000009763	PCGF2
ENSOARG00000009767	HPS5
ENSOARG00000009769	TRAF3IP2
ENSOARG00000009773	RAD23A
ENSOARG00000009787	RNF41
ENSOARG00000009794	DGKI
ENSOARG00000009812	FREM2
ENSOARG00000009831	PSMB3
ENSOARG00000009832	TRMT9B
ENSOARG00000009854	EXT1
ENSOARG00000009860	ROR1
ENSOARG00000009869
ENSOARG00000009870	CALR
ENSOARG00000009874	KCTD9
ENSOARG00000009889	GNRH1
ENSOARG00000009905	MBOAT1
ENSOARG00000009918	DOCK5
ENSOARG00000009924	ANXA11
ENSOARG00000009929	SLC45A1
ENSOARG00000009954
ENSOARG00000009955	CUBN
ENSOARG00000009960	PAK5
ENSOARG00000009971	TMEM98
ENSOARG00000009973	EMILIN2
ENSOARG00000009984	PLAC9
ENSOARG00000010007	OTUD6B
ENSOARG00000010026	ADAM28
ENSOARG00000010056	METTL24
ENSOARG00000010081	LPIN2
ENSOARG00000010097	CLCN5
ENSOARG00000010098	CDC40
ENSOARG00000010155	RNF144B
ENSOARG00000010184	AK4
ENSOARG00000010187	WDR70
ENSOARG00000010191	PEBP4
ENSOARG00000010280	SORBS3
ENSOARG00000010286	DNAJC6
ENSOARG00000010313	TBRG1
ENSOARG00000010317	MKKS
ENSOARG00000010357	PIWIL2
ENSOARG00000010370	SLX4IP
ENSOARG00000010384	PHYHIP
ENSOARG00000010405	BMP1
ENSOARG00000010432	PDCD4
ENSOARG00000010437	DLGAP1
ENSOARG00000010452
ENSOARG00000010466	CLIC5
ENSOARG00000010473	EPB41L3
ENSOARG00000010479
ENSOARG00000010496	OSBPL3
ENSOARG00000010535
ENSOARG00000010549	LRIG1
ENSOARG00000010558	SHOC2
ENSOARG00000010584	RNF169
ENSOARG00000010603	VSIG2
ENSOARG00000010622	YIPF4
ENSOARG00000010627	NBEA
ENSOARG00000010631	DOK2
ENSOARG00000010638	NLRC4
ENSOARG00000010646
ENSOARG00000010656	SLC25A26
ENSOARG00000010663	SLC30A6
ENSOARG00000010710	CALN1
ENSOARG00000010714	USH2A
ENSOARG00000010736	GSDME
ENSOARG00000010739	UPF1
ENSOARG00000010742	AGBL1
ENSOARG00000010755	CYP39A1
ENSOARG00000010762
ENSOARG00000010765	UAP1
ENSOARG00000010767
ENSOARG00000010768	AFG1L
ENSOARG00000010797
ENSOARG00000010808	TEAD4
ENSOARG00000010833
ENSOARG00000010841	DNAH11
ENSOARG00000010857	ZBTB7A
ENSOARG00000010915	NPY
ENSOARG00000010940
ENSOARG00000010952	ARHGEF6
ENSOARG00000010962	ADAMTS9
ENSOARG00000010988	PIAS4
ENSOARG00000011082	GABBR2
ENSOARG00000011083	IL23R
ENSOARG00000011088
ENSOARG00000011090	TRDMT1
ENSOARG00000011093
ENSOARG00000011098	PDP2
ENSOARG00000011164
ENSOARG00000011181
ENSOARG00000011185	AVPI1
ENSOARG00000011188	MYH7B
ENSOARG00000011189	NUF2
ENSOARG00000011193	FOXE1
ENSOARG00000011199	ATG5
ENSOARG00000011227
ENSOARG00000011253	HAPLN3
ENSOARG00000011260	MFGE8
ENSOARG00000011267	CSMD3
ENSOARG00000011279	PHF13
ENSOARG00000011302	PSMD6
ENSOARG00000011315	SPEF2
ENSOARG00000011317	CCDC180
ENSOARG00000011331	PREP
ENSOARG00000011340	MMP16
ENSOARG00000011342	ARRB1
ENSOARG00000011354	KLHL21
ENSOARG00000011371
ENSOARG00000011383	WLS
ENSOARG00000011408	FRY
ENSOARG00000011426	ZBTB48
ENSOARG00000011475	CNBD1
ENSOARG00000011482	GRHPR
ENSOARG00000011494
ENSOARG00000011499
ENSOARG00000011501	GRIK2
ENSOARG00000011555
ENSOARG00000011614
ENSOARG00000011616
ENSOARG00000011627	ASCC3
ENSOARG00000011645	STAM
ENSOARG00000011650	TMC7
ENSOARG00000011661	SORCS2
ENSOARG00000011668	SBF2
ENSOARG00000011695	TRPC4AP
ENSOARG00000011701	TMEM8B
ENSOARG00000011703	VPS53
ENSOARG00000011719	LRRC7
ENSOARG00000011740	LIAS
ENSOARG00000011752	LRRC43
ENSOARG00000011762	NPR2
ENSOARG00000011846	NTN4
ENSOARG00000011847
ENSOARG00000011867	RFLNB
ENSOARG00000011869	AMACR
ENSOARG00000011880	UGDH
ENSOARG00000011885	DPP10
ENSOARG00000011902	SLC45A2
ENSOARG00000011922	FAXC
ENSOARG00000011947	AFAP1
ENSOARG00000011950
ENSOARG00000011980
ENSOARG00000011993	ADAMTS12
ENSOARG00000012004
ENSOARG00000012013	MMP24
ENSOARG00000012045	KLHL32
ENSOARG00000012051	MTUS2
ENSOARG00000012075	CDON
ENSOARG00000012106	PIP5K1C
ENSOARG00000012113	UFL1
ENSOARG00000012120	STX1A
ENSOARG00000012148	MANEA
ENSOARG00000012174	EIF6
ENSOARG00000012203
ENSOARG00000012207	EPHA7
ENSOARG00000012213	WDR13
ENSOARG00000012216
ENSOARG00000012221	PDS5A
ENSOARG00000012232	BUD23
ENSOARG00000012242	FAM83C
ENSOARG00000012245	MTMR12
ENSOARG00000012250	RBM3
ENSOARG00000012269	UQCC1
ENSOARG00000012284	NIPAL4
ENSOARG00000012294	C11orf65
ENSOARG00000012312	GOLPH3
ENSOARG00000012313	RAB37
ENSOARG00000012336	TLE4
ENSOARG00000012348	TMEM134
ENSOARG00000012360	ELK3
ENSOARG00000012364
ENSOARG00000012373	ADAM19
ENSOARG00000012387
ENSOARG00000012407	ERICH3
ENSOARG00000012441	RMDN1
ENSOARG00000012446
ENSOARG00000012452	ADARB1
ENSOARG00000012489	AIP
ENSOARG00000012515	PCSK5
ENSOARG00000012534	FRMD7
ENSOARG00000012535	TNS3
ENSOARG00000012552	OSTF1
ENSOARG00000012565	YPEL2
ENSOARG00000012585
ENSOARG00000012595
ENSOARG00000012625	PITPNM1
ENSOARG00000012632	DHX40
ENSOARG00000012649	C10orf90
ENSOARG00000012666	JARID2
ENSOARG00000012668	ANKRD6
ENSOARG00000012670	SLC26A8
ENSOARG00000012697
ENSOARG00000012703
ENSOARG00000012707	MRPS6
ENSOARG00000012714	DDX10
ENSOARG00000012717	CLGN
ENSOARG00000012729
ENSOARG00000012741	MAPKAP1
ENSOARG00000012755	GDA
ENSOARG00000012788	CLINT1
ENSOARG00000012806	CDH12
ENSOARG00000012824	GRPR
ENSOARG00000012846	TRPM3
ENSOARG00000012935	AK5
ENSOARG00000012949	C9orf135
ENSOARG00000012967	AKIRIN2
ENSOARG00000012973	RALB
ENSOARG00000012974
ENSOARG00000012992	ORC3
ENSOARG00000012999	ZC3H12C
ENSOARG00000013013	SYN1
ENSOARG00000013062	SETD7
ENSOARG00000013071
ENSOARG00000013075	PIP5K1B
ENSOARG00000013089	CACNA1C
ENSOARG00000013119	SNTG1
ENSOARG00000013146	IL12B
ENSOARG00000013157	TIMP1
ENSOARG00000013158	SPDYC
ENSOARG00000013160	OTULINL
ENSOARG00000013166
ENSOARG00000013196	OR5A1
ENSOARG00000013211	KANK1
ENSOARG00000013216	PCDH15
ENSOARG00000013235	DMRT3
ENSOARG00000013238	SLC39A8
ENSOARG00000013259	FUBP1
ENSOARG00000013286	RDX
ENSOARG00000013287
ENSOARG00000013294
ENSOARG00000013308	OR4D6
ENSOARG00000013320	REPS2
ENSOARG00000013324
ENSOARG00000013349
ENSOARG00000013366	TNFRSF19
ENSOARG00000013378	GLIS3
ENSOARG00000013380	RHBDD2
ENSOARG00000013446	SFMBT2
ENSOARG00000013511	FBXO25
ENSOARG00000013534	MYOC
ENSOARG00000013542	TDRP
ENSOARG00000013551	ARHGAP20
ENSOARG00000013564	BSN
ENSOARG00000013579
ENSOARG00000013597	PSMB7
ENSOARG00000013606	ATP10B
ENSOARG00000013609
ENSOARG00000013623	PPP3CA
ENSOARG00000013661	NEK6
ENSOARG00000013726	AGK
ENSOARG00000013743	GABRB2
ENSOARG00000013755	PTPRD
ENSOARG00000013756	ARHGAP12
ENSOARG00000013769
ENSOARG00000013781	PARD6B
ENSOARG00000013817	RGN
ENSOARG00000013850	CRB2
ENSOARG00000013851	UNC79
ENSOARG00000013861	MPDZ
ENSOARG00000013887	NFIB
ENSOARG00000013905
ENSOARG00000013915	DENND11
ENSOARG00000013985
ENSOARG00000014001	GABRG2
ENSOARG00000014002	PSIP1
ENSOARG00000014011	FADS3
ENSOARG00000014022
ENSOARG00000014058	LPAR3
ENSOARG00000014065	C11orf16
ENSOARG00000014106	SH3GL2
ENSOARG00000014107	ZNF438
ENSOARG00000014155	H1FOO
ENSOARG00000014158	AKIP1
ENSOARG00000014160	SAXO1
ENSOARG00000014200
ENSOARG00000014206	RAB3IL1
ENSOARG00000014225
ENSOARG00000014227	SUCO
ENSOARG00000014279	RHO
ENSOARG00000014312	AJAP1
ENSOARG00000014319	DDAH1
ENSOARG00000014331
ENSOARG00000014339	FTH1
ENSOARG00000014340	SLC39A10
ENSOARG00000014356	HIVEP1
ENSOARG00000014398	ERN1
ENSOARG00000014404	TTLL11
ENSOARG00000014407
ENSOARG00000014461	COL24A1
ENSOARG00000014470	IFT122
ENSOARG00000014484
ENSOARG00000014505
ENSOARG00000014513	PRR32
ENSOARG00000014516	NOP14
ENSOARG00000014549	ODF2L
ENSOARG00000014575
ENSOARG00000014585
ENSOARG00000014594
ENSOARG00000014615
ENSOARG00000014651	MOB3B
ENSOARG00000014655	ZMIZ2
ENSOARG00000014661	RNF144A
ENSOARG00000014662
ENSOARG00000014708
ENSOARG00000014748
ENSOARG00000014755	TMEM220
ENSOARG00000014772	ADD1
ENSOARG00000014773
ENSOARG00000014799	RASGRF1
ENSOARG00000014877	ADAMTS5
ENSOARG00000014930	SMAD5
ENSOARG00000014982	ARL14
ENSOARG00000014996	NAV3
ENSOARG00000015005
ENSOARG00000015027	SYT1
ENSOARG00000015058	SH3KBP1
ENSOARG00000015081	TGFBI
ENSOARG00000015100	ANGPT1
ENSOARG00000015103
ENSOARG00000015136	KLHL1
ENSOARG00000015197	MED10
ENSOARG00000015212	GLO1
ENSOARG00000015217	TRPC7
ENSOARG00000015218
ENSOARG00000015282	KCTD14
ENSOARG00000015313	SPOCK1
ENSOARG00000015338
ENSOARG00000015398
ENSOARG00000015405	CAMK1D
ENSOARG00000015414
ENSOARG00000015462	COQ10B
ENSOARG00000015472	C3H12orf29
ENSOARG00000015476	HSPD1
ENSOARG00000015531	CEP290
ENSOARG00000015551	MAP1S
ENSOARG00000015555	NCAM2
ENSOARG00000015556	OR8B4
ENSOARG00000015576
ENSOARG00000015585
ENSOARG00000015644	BOLL
ENSOARG00000015650	DPYS
ENSOARG00000015655	OCA2
ENSOARG00000015680	ATP2B1
ENSOARG00000015701
ENSOARG00000015718	PTPRC
ENSOARG00000015807	UNC13A
ENSOARG00000015870	PAH
ENSOARG00000015906
ENSOARG00000015926	TEX11
ENSOARG00000015941	HSPA4L
ENSOARG00000015979	RIMS2
ENSOARG00000015980	NR5A2
ENSOARG00000016004	MCC
ENSOARG00000016016	VEZT
ENSOARG00000016064
ENSOARG00000016119	SLC25A31
ENSOARG00000016123	SEPTIN6
ENSOARG00000016138	CD5
ENSOARG00000016158
ENSOARG00000016163	TRBV16
ENSOARG00000016168	TRIB2
ENSOARG00000016172
ENSOARG00000016187	FNIP1
ENSOARG00000016206	TRBV19
ENSOARG00000016232
ENSOARG00000016264	VPS37C
ENSOARG00000016280
ENSOARG00000016295	NECTIN1
ENSOARG00000016310	RPAP2
ENSOARG00000016347	RAP1GDS1
ENSOARG00000016372	ART3
ENSOARG00000016384	CDK14
ENSOARG00000016403
ENSOARG00000016492	AMHR2
ENSOARG00000016514	SP1
ENSOARG00000016527	TDG
ENSOARG00000016547	CALCRL
ENSOARG00000016568
ENSOARG00000016571
ENSOARG00000016573	TARSL2
ENSOARG00000016578	VSNL1
ENSOARG00000016595	TMEM132D
ENSOARG00000016598	ABL2
ENSOARG00000016611	CXCL10
ENSOARG00000016640	GLT8D2
ENSOARG00000016641
ENSOARG00000016652	PCNX3
ENSOARG00000016657	PCSK6
ENSOARG00000016659	DCHS1
ENSOARG00000016685	CCDC18
ENSOARG00000016695	MVB12A
ENSOARG00000016737	TNS2
ENSOARG00000016749
ENSOARG00000016757	MINAR2
ENSOARG00000016759	EIF4B
ENSOARG00000016778	POLK
ENSOARG00000016786	KRT8
ENSOARG00000016825	ADAMTS19
ENSOARG00000016840	PRRG4
ENSOARG00000016880	OSR1
ENSOARG00000016884	CACNA1I
ENSOARG00000016920
ENSOARG00000016960	CRHBP
ENSOARG00000016967	KLHL15
ENSOARG00000016968	C11orf87
ENSOARG00000017027	ENTHD1
ENSOARG00000017032	OR2I1P
ENSOARG00000017050	SLC27A6
ENSOARG00000017072	TRPV5
ENSOARG00000017102
ENSOARG00000017118
ENSOARG00000017152	ASCL3
ENSOARG00000017156
ENSOARG00000017189	FBN2
ENSOARG00000017191	SIPA1
ENSOARG00000017193	ARHGAP29
ENSOARG00000017200
ENSOARG00000017206	CFAP46
ENSOARG00000017222	FGF2
ENSOARG00000017240	HECW1
ENSOARG00000017278	JMY
ENSOARG00000017279	NLK
ENSOARG00000017295	HOMER1
ENSOARG00000017314	GALNT6
ENSOARG00000017318	CTNS
ENSOARG00000017327	CELA1
ENSOARG00000017357
ENSOARG00000017378
ENSOARG00000017386	TRIM27
ENSOARG00000017426	RELA
ENSOARG00000017434	CMYA5
ENSOARG00000017474	JUP
ENSOARG00000017475	INHBA
ENSOARG00000017497	KLHL29
ENSOARG00000017505	SUGCT
ENSOARG00000017507	TMPRSS12
ENSOARG00000017524	MAGI2
ENSOARG00000017525	GPR33
ENSOARG00000017547	USHBP1
ENSOARG00000017549	DPYD
ENSOARG00000017554	UBR5
ENSOARG00000017574	POLA1
ENSOARG00000017577	ING5
ENSOARG00000017587	PDCD1
ENSOARG00000017603
ENSOARG00000017613	SLC12A2
ENSOARG00000017630	NR2F6
ENSOARG00000017690	OR10AD1
ENSOARG00000017693
ENSOARG00000017698	POU6F2
ENSOARG00000017707	BRI3BP
ENSOARG00000017709	CAST
ENSOARG00000017714	CCDC184
ENSOARG00000017717	SPG21
ENSOARG00000017721	OCEL1
ENSOARG00000017760	CCDC192
ENSOARG00000017766	PRRC1
ENSOARG00000017767
ENSOARG00000017786	USE1
ENSOARG00000017815
ENSOARG00000017825	SGK3
ENSOARG00000017828
ENSOARG00000017856	MEGF10
ENSOARG00000017917	GRIK4
ENSOARG00000017919	SHTN1
ENSOARG00000017939	FTO
ENSOARG00000017941	DPP8
ENSOARG00000017950	TNRC6A
ENSOARG00000017958	ANKIB1
ENSOARG00000017981
ENSOARG00000018014	RRM2B
ENSOARG00000018023	SLC16A2
ENSOARG00000018027	IRX6
ENSOARG00000018039	BMP7
ENSOARG00000018062	GUCY2F
ENSOARG00000018080
ENSOARG00000018100	LIX1
ENSOARG00000018113	MEGF11
ENSOARG00000018126	IRS4
ENSOARG00000018144	SNED1
ENSOARG00000018149
ENSOARG00000018158
ENSOARG00000018163	RGMB
ENSOARG00000018185	MAP2K1
ENSOARG00000018198	SNAPC5
ENSOARG00000018201	ARFIP2
ENSOARG00000018207
ENSOARG00000018208	PHAX
ENSOARG00000018220	CPED1
ENSOARG00000018225	ZWILCH
ENSOARG00000018233
ENSOARG00000018252	SLC18A2
ENSOARG00000018257	TRIM3
ENSOARG00000018268
ENSOARG00000018279	LARGE1
ENSOARG00000018314	AGXT
ENSOARG00000018317	COL4A6
ENSOARG00000018328	IQCH
ENSOARG00000018337	CPAMD8
ENSOARG00000018342	CCSER1
ENSOARG00000018344	ALDH7A1
ENSOARG00000018353	MAP2K5
ENSOARG00000018396	SCARB1
ENSOARG00000018411	CALML4
ENSOARG00000018417	CLN6
ENSOARG00000018428
ENSOARG00000018443
ENSOARG00000018444	PDZD8
ENSOARG00000018454	ABTB2
ENSOARG00000018504	TPK1
ENSOARG00000018517	CORO2B
ENSOARG00000018522	FAM133B
ENSOARG00000018543	NSFL1C
ENSOARG00000018561
ENSOARG00000018572	CDK6
ENSOARG00000018580	AASS
ENSOARG00000018589
ENSOARG00000018597
ENSOARG00000018604	GLCE
ENSOARG00000018623	ZNF608
ENSOARG00000018695	TLE3
ENSOARG00000018718
ENSOARG00000018732	UACA
ENSOARG00000018751	KDM8
ENSOARG00000018754
ENSOARG00000018757	GLUL
ENSOARG00000018765	LRRC49
ENSOARG00000018784
ENSOARG00000018811	VAV3
ENSOARG00000018918	SNX24
ENSOARG00000018945	TCF20
ENSOARG00000018956	SLC25A46
ENSOARG00000018974	ZNF398
ENSOARG00000019038	TAF13
ENSOARG00000019060	TMEM167B
ENSOARG00000019071	MORC1
ENSOARG00000019077	C1orf194
ENSOARG00000019101	MAP2
ENSOARG00000019129	TRIB3
ENSOARG00000019206	PHLDB2
ENSOARG00000019208	C1QTNF6
ENSOARG00000019256
ENSOARG00000019257
ENSOARG00000019288	ASB8
ENSOARG00000019289	SHISAL1
ENSOARG00000019300	PFKM
ENSOARG00000019335
ENSOARG00000019344	NEU2
ENSOARG00000019379	BICD1
ENSOARG00000019388	CSMD2
ENSOARG00000019399	GPN1
ENSOARG00000019402	AMN1
ENSOARG00000019406	LRP10
ENSOARG00000019410	SUPT7L
ENSOARG00000019414	MMP14
ENSOARG00000019433	SLC16A4
ENSOARG00000019434	SLC4A1AP
ENSOARG00000019556	CCDC191
ENSOARG00000019641	LSAMP
ENSOARG00000019720	TMEM185B
ENSOARG00000019737
ENSOARG00000019818	MAGI3
ENSOARG00000019845
ENSOARG00000019849	GKN1
ENSOARG00000019873	YRDC
ENSOARG00000019892	C1orf122
ENSOARG00000019896	MTF1
ENSOARG00000019900	FSTL1
ENSOARG00000019904	NDUFB4
ENSOARG00000019919
ENSOARG00000019958	TPBG
ENSOARG00000019975	LMNTD1
ENSOARG00000019977	STXBP5L
ENSOARG00000019980
ENSOARG00000019999	KRAS
ENSOARG00000020009	POLQ
ENSOARG00000020021	CASC1
ENSOARG00000020038	POM121L2
ENSOARG00000020044	RASGRP1
ENSOARG00000020046
ENSOARG00000020108	EHBP1
ENSOARG00000020110	SOX5
ENSOARG00000020144	VANGL1
ENSOARG00000020167	SLC49A4
ENSOARG00000020173	SEMA5B
ENSOARG00000020301
ENSOARG00000020304
ENSOARG00000020316	SLC51A
ENSOARG00000020318	PCYT1A
ENSOARG00000020330	EXD1
ENSOARG00000020336	CHP1
ENSOARG00000020362
ENSOARG00000020369	IAPP
ENSOARG00000020376	TBX15
ENSOARG00000020379	RPAP1
ENSOARG00000020387	TYRO3
ENSOARG00000020391	AP1S3
ENSOARG00000020406	RIMKLA
ENSOARG00000020418	MAPKBP1
ENSOARG00000020428	DNAH6
ENSOARG00000020434
ENSOARG00000020437	DOCK10
ENSOARG00000020442	NOTCH2
ENSOARG00000020483
ENSOARG00000020484	LPP
ENSOARG00000020531	PIK3C2G
ENSOARG00000020558
ENSOARG00000020570	ATOH8
ENSOARG00000020571	TTBK2
ENSOARG00000020607	POLE2
ENSOARG00000020608	DNER
ENSOARG00000020611	KLHDC1
ENSOARG00000020636	DMAC2L
ENSOARG00000020643	CDKL1
ENSOARG00000020653	MCF2L2
ENSOARG00000020655	B3GNT5
ENSOARG00000020660	MCCC1
ENSOARG00000020676	RERG
ENSOARG00000020691	TRIM9
ENSOARG00000020715	RMND5A
ENSOARG00000020722	NAALADL2
ENSOARG00000020732	SPATA16
ENSOARG00000020737	NCEH1
ENSOARG00000020750	SMYD1
ENSOARG00000020752	FABP1
ENSOARG00000020754	OTUD7B
ENSOARG00000020783	C1orf54
ENSOARG00000020795	CIART
ENSOARG00000020796	MRPS21
ENSOARG00000020856	LIPC
ENSOARG00000020867	CGNL1
ENSOARG00000020878	MNS1
ENSOARG00000020882	TEX9
ENSOARG00000020918	UNC13C
ENSOARG00000020977	CYP19
ENSOARG00000021091	FBXO34
ENSOARG00000021104
ENSOARG00000021110	ARID4A
ENSOARG00000021117	DAAM1
ENSOARG00000021133	SLC38A6
ENSOARG00000021134
ENSOARG00000021141	KCNH5
ENSOARG00000021142	RHOJ
ENSOARG00000021162	GPHN
ENSOARG00000021440	MIR144
ENSOARG00000021441	U3
ENSOARG00000021479	U6
ENSOARG00000021494
ENSOARG00000021496	5S_rRNA
ENSOARG00000021514	SNORD22
ENSOARG00000021527	U6
ENSOARG00000021668
ENSOARG00000021797
ENSOARG00000021801
ENSOARG00000021802	7SK
ENSOARG00000021803
ENSOARG00000021864	U6
ENSOARG00000021918	5S_rRNA
ENSOARG00000021934
ENSOARG00000022018
ENSOARG00000022022	U6
ENSOARG00000022023	U6
ENSOARG00000022048	U6
ENSOARG00000022110
ENSOARG00000022123	Y_RNA
ENSOARG00000022143
ENSOARG00000022149
ENSOARG00000022161
ENSOARG00000022178
ENSOARG00000022202
ENSOARG00000022214
ENSOARG00000022252
ENSOARG00000022332
ENSOARG00000022352
ENSOARG00000022379	U6
ENSOARG00000022397
ENSOARG00000022425	7SK
ENSOARG00000022450	U6
ENSOARG00000022454	U6
ENSOARG00000022471	U6
ENSOARG00000022528
ENSOARG00000022569	7SK
ENSOARG00000022585	U6
ENSOARG00000022661	SNORD16
ENSOARG00000022696
ENSOARG00000022755
ENSOARG00000022784
ENSOARG00000022825
ENSOARG00000022839	SNORD18
ENSOARG00000022938	oar-mir-133
ENSOARG00000022974
ENSOARG00000023046
ENSOARG00000023068	5S_rRNA
ENSOARG00000023117	MIR582
ENSOARG00000023142	Vault
ENSOARG00000023212
ENSOARG00000023215	U6
ENSOARG00000023232
ENSOARG00000023343	U6
ENSOARG00000023427	U6
ENSOARG00000023442	U6
ENSOARG00000023512
ENSOARG00000023540
ENSOARG00000023637
ENSOARG00000023744
ENSOARG00000023762
ENSOARG00000023905
ENSOARG00000023908	U6
ENSOARG00000023974
ENSOARG00000024139	U6
ENSOARG00000024214
ENSOARG00000024283	U5
ENSOARG00000024310	SNORD18
ENSOARG00000024352	MIR490
ENSOARG00000024356	U1
ENSOARG00000024389	7SK
ENSOARG00000024432
ENSOARG00000024477	MIR340
ENSOARG00000024494
ENSOARG00000024495
ENSOARG00000024496
ENSOARG00000024527	SNORA72
ENSOARG00000024542	5S_rRNA
ENSOARG00000024599	U6
ENSOARG00000024600	7SK
ENSOARG00000024611	SNORA70
ENSOARG00000024621	MIR451A
ENSOARG00000024650
ENSOARG00000024684	5S_rRNA
ENSOARG00000024706
ENSOARG00000024758	U6
ENSOARG00000024792
ENSOARG00000024826	7SK
ENSOARG00000024836	SNORD18
ENSOARG00000024870
ENSOARG00000024885
ENSOARG00000024907	SNORA70
ENSOARG00000024980
ENSOARG00000025132
ENSOARG00000025183
ENSOARG00000025202
ENSOARG00000025215
ENSOARG00000025221
ENSOARG00000025223
ENSOARG00000025242
ENSOARG00000025255
ENSOARG00000025264
ENSOARG00000025265
ENSOARG00000025266
ENSOARG00000025278
ENSOARG00000025279
ENSOARG00000025281
ENSOARG00000025282
ENSOARG00000025353
ENSOARG00000025364
ENSOARG00000025384
ENSOARG00000025437
ENSOARG00000025438
ENSOARG00000025448
ENSOARG00000025449
ENSOARG00000025466
ENSOARG00000025485
ENSOARG00000025486
ENSOARG00000025487
ENSOARG00000025488
ENSOARG00000025489
ENSOARG00000025494
ENSOARG00000025511
ENSOARG00000025527
ENSOARG00000025536
ENSOARG00000025698
ENSOARG00000025723
ENSOARG00000025737
ENSOARG00000025741
ENSOARG00000025760
ENSOARG00000025762
ENSOARG00000025765
ENSOARG00000025773
ENSOARG00000025780
ENSOARG00000025798
ENSOARG00000025852
ENSOARG00000025895
ENSOARG00000025922
ENSOARG00000025940
ENSOARG00000025941
ENSOARG00000025957
ENSOARG00000025958
ENSOARG00000026040
ENSOARG00000026055
ENSOARG00000026070
ENSOARG00000026095
ENSOARG00000026108
ENSOARG00000026109
ENSOARG00000026151
ENSOARG00000026180
ENSOARG00000026204
ENSOARG00000026243
ENSOARG00000026245
ENSOARG00000026271
ENSOARG00000026274
ENSOARG00000026284
ENSOARG00000026288
ENSOARG00000026305
ENSOARG00000026306
ENSOARG00000026349
ENSOARG00000026409
ENSOARG00000026415
ENSOARG00000026433
ENSOARG00000026491
ENSOARG00000026528
ENSOARG00000026556
ENSOARG00000026581
ENSOARG00000026582
ENSOARG00000026588
ENSOARG00000026615
ENSOARG00000026620
ENSOARG00000026653
ENSOARG00000026682
ENSOARG00000026687
ENSOARG00000026695
ENSOARG00000026696
ENSOARG00000026713
ENSOARG00000026732
ENSOARG00000026736
ENSOARG00000026749
ENSOARG00000026777
ENSOARG00000026778
ENSOARG00000026782
ENSOARG00000026793
ENSOARG00000026808
ENSOARG00000026819
ENSOARG00000026822
ENSOARG00000026845
ENSOARG00000026872
ENSOARG00000026875
ENSOARG00000026909
ENSOARG00000026929
ENSOARG00000026955
ENSOARG00000026969
ENSOARG00000026984
ENSOARG00000027016
ENSOARG00000027021

## Sheet: Table S10
Table S10: Significant Genes used in GSEA for LMWB trait.
Ensembel gene ID	Gene name
ENSOARG00000000040	ACBD3
ENSOARG00000000048	PIGS
ENSOARG00000000193	CADPS2
ENSOARG00000000229	NRG1
ENSOARG00000000252	SYTL5
ENSOARG00000000269	RASGEF1B
ENSOARG00000000294	CACUL1
ENSOARG00000000302	POLR2C
ENSOARG00000000329	SRFBP1
ENSOARG00000000343	DOK4
ENSOARG00000000389	PGLYRP3
ENSOARG00000000406	PGLYRP4
ENSOARG00000000438	GRID1
ENSOARG00000000439	KIAA0556
ENSOARG00000000452	SNX31
ENSOARG00000000465	RELN
ENSOARG00000000470	DCAF16
ENSOARG00000000484	ALDOC
ENSOARG00000000488	RPTOR
ENSOARG00000000512
ENSOARG00000000545	PRR16
ENSOARG00000000549	PTPRM
ENSOARG00000000725	MAP3K20
ENSOARG00000000770	ZNF202
ENSOARG00000000803	MTCL1
ENSOARG00000000809	STAT5A
ENSOARG00000000823	ERI3
ENSOARG00000000924
ENSOARG00000000952	SEC23B
ENSOARG00000001001	SPAG5
ENSOARG00000001014	PDK1
ENSOARG00000001069	GOLIM4
ENSOARG00000001112	SMIM26
ENSOARG00000001152
ENSOARG00000001158	LAT
ENSOARG00000001166	NRIP1
ENSOARG00000001174
ENSOARG00000001386	SPNS1
ENSOARG00000001399	SLC24A3
ENSOARG00000001400	GPR37
ENSOARG00000001448	PNPLA6
ENSOARG00000001456	GFPT2
ENSOARG00000001474	HIST3H2BB
ENSOARG00000001477	HIST3H2A
ENSOARG00000001488	HIST3H3
ENSOARG00000001511	STAT3
ENSOARG00000001541	PEX3
ENSOARG00000001544	RIPK1
ENSOARG00000001555	NFATC2IP
ENSOARG00000001560	ARHGAP22
ENSOARG00000001591	FUCA2
ENSOARG00000001634	PHACTR2
ENSOARG00000001659	WDFY4
ENSOARG00000001662	DTWD2
ENSOARG00000001725	IMPA2
ENSOARG00000001727	DISP3
ENSOARG00000001733
ENSOARG00000001793	AKR1A1
ENSOARG00000001813	NUP210L
ENSOARG00000001820
ENSOARG00000001874	UTRN
ENSOARG00000001896	ATP6V0A1
ENSOARG00000001903	PITPNB
ENSOARG00000001974	RNF130
ENSOARG00000001990	DRGX
ENSOARG00000002015	XAB2
ENSOARG00000002066	PRDM11
ENSOARG00000002070	RGL1
ENSOARG00000002073	SHPRH
ENSOARG00000002087	PET100
ENSOARG00000002119	PCP2
ENSOARG00000002149	SND1
ENSOARG00000002175	DNASE1
ENSOARG00000002202
ENSOARG00000002223	MYOF
ENSOARG00000002236	STXBP2
ENSOARG00000002243	SYT13
ENSOARG00000002256	TRAP1
ENSOARG00000002291	RETN
ENSOARG00000002319	PARG
ENSOARG00000002325
ENSOARG00000002345	SLC25A38
ENSOARG00000002353	LRRC4
ENSOARG00000002387	TRAPPC5
ENSOARG00000002412	CDH16
ENSOARG00000002441
ENSOARG00000002445	FCER2
ENSOARG00000002476	RGS10
ENSOARG00000002491
ENSOARG00000002494
ENSOARG00000002548	UST
ENSOARG00000002590	SPP1
ENSOARG00000002606	DEUP1
ENSOARG00000002627	ATRN
ENSOARG00000002693	CNNM2
ENSOARG00000002748	NRXN3
ENSOARG00000002760	2021-03-08
ENSOARG00000002779	EDEM3
ENSOARG00000002800	UBE2Q1
ENSOARG00000002819	ALOX5
ENSOARG00000002845	PSTPIP2
ENSOARG00000002858	OR13A1
ENSOARG00000002921	CHRNB2
ENSOARG00000002931	DOCK4
ENSOARG00000002991	CXCL12
ENSOARG00000003004	MND1
ENSOARG00000003012	PLEKHG1
ENSOARG00000003057
ENSOARG00000003069	C18orf25
ENSOARG00000003084	RTN3
ENSOARG00000003086	KCNK10
ENSOARG00000003103	FAT3
ENSOARG00000003122	SPATA7
ENSOARG00000003125
ENSOARG00000003131
ENSOARG00000003164
ENSOARG00000003188	CREB3L1
ENSOARG00000003189	INPP5F
ENSOARG00000003190	STK24
ENSOARG00000003209	AGAP3
ENSOARG00000003257	LGALS3BP
ENSOARG00000003291	DISC1
ENSOARG00000003298	EDDM13
ENSOARG00000003309	C11orf95
ENSOARG00000003324	LYZL4
ENSOARG00000003374	LRRN3
ENSOARG00000003379	EFCAB11
ENSOARG00000003400	RALGAPA2
ENSOARG00000003502	CHRNB3
ENSOARG00000003519	TTC7B
ENSOARG00000003564	STIL
ENSOARG00000003569	KSR2
ENSOARG00000003570	LGI1
ENSOARG00000003573	RNF2
ENSOARG00000003581	CMPK1
ENSOARG00000003585	ELMO1
ENSOARG00000003675	HEATR1
ENSOARG00000003681	ZBTB7C
ENSOARG00000003688	NUP88
ENSOARG00000003718	MAPK3
ENSOARG00000003726	HARBI1
ENSOARG00000003734	SLC50A1
ENSOARG00000003736	FAM184B
ENSOARG00000003747	KRTCAP2
ENSOARG00000003754	CTIF
ENSOARG00000003759
ENSOARG00000003769	TRIM46
ENSOARG00000003771	GDPD3
ENSOARG00000003775	FOLH1
ENSOARG00000003788
ENSOARG00000003799	ATG13
ENSOARG00000003845
ENSOARG00000003846	SLC5A9
ENSOARG00000003856
ENSOARG00000003882	YPEL3
ENSOARG00000003884
ENSOARG00000003894	THBS3
ENSOARG00000003915	SRGAP1
ENSOARG00000003952	NUCB2
ENSOARG00000003966
ENSOARG00000003979	RABEP1
ENSOARG00000003983	KDM6A
ENSOARG00000004016	NCAPG
ENSOARG00000004021
ENSOARG00000004031	ATP6V0E1
ENSOARG00000004040	TBX6
ENSOARG00000004044	UBAC2
ENSOARG00000004073	PSD3
ENSOARG00000004086	BICC1
ENSOARG00000004089	CREBRF
ENSOARG00000004096	BNIP1
ENSOARG00000004100	PPP4C
ENSOARG00000004134	MED12L
ENSOARG00000004143
ENSOARG00000004153	NKX2-5
ENSOARG00000004210	NOS1
ENSOARG00000004228	NOX3
ENSOARG00000004249
ENSOARG00000004252	ILVBL
ENSOARG00000004269	TOP2B
ENSOARG00000004273	CLRN1
ENSOARG00000004281	NEFH
ENSOARG00000004305	FAF1
ENSOARG00000004333	LCORL
ENSOARG00000004357	NEURL1
ENSOARG00000004376	FLRT1
ENSOARG00000004381	TMEM26
ENSOARG00000004404	SBNO1
ENSOARG00000004409	SYDE1
ENSOARG00000004453
ENSOARG00000004463
ENSOARG00000004468	THOC5
ENSOARG00000004541	CINP
ENSOARG00000004573	VAC14
ENSOARG00000004606	COL22A1
ENSOARG00000004628
ENSOARG00000004684	RNF13
ENSOARG00000004702	LRP4
ENSOARG00000004706	FLOT2
ENSOARG00000004715
ENSOARG00000004720
ENSOARG00000004731	CTNNA3
ENSOARG00000004737	CPQ
ENSOARG00000004741	LRRTM3
ENSOARG00000004789	HTR4
ENSOARG00000004809
ENSOARG00000004819	ARHGEF28
ENSOARG00000004843	C1GALT1
ENSOARG00000004848	ITGBL1
ENSOARG00000004860	DHRS13
ENSOARG00000004861	STXBP6
ENSOARG00000004874	FAM160A1
ENSOARG00000004925	MYPN
ENSOARG00000004967	DOK6
ENSOARG00000005004	FCHO2
ENSOARG00000005016	STXBP4
ENSOARG00000005021	C11orf49
ENSOARG00000005023	PHF12
ENSOARG00000005038	TNPO1
ENSOARG00000005121	AFAP1L1
ENSOARG00000005151	HMCN1
ENSOARG00000005183	DLG2
ENSOARG00000005190	ACTRT2
ENSOARG00000005206	OPTN
ENSOARG00000005226	VPS16
ENSOARG00000005263	PLEKHA7
ENSOARG00000005282	ORC1
ENSOARG00000005285	CLPB
ENSOARG00000005292	CPA5
ENSOARG00000005303	ZNF567
ENSOARG00000005317	COG5
ENSOARG00000005343
ENSOARG00000005344	CPA1
ENSOARG00000005373	PRPF38A
ENSOARG00000005436
ENSOARG00000005476	ALPK2
ENSOARG00000005487
ENSOARG00000005492
ENSOARG00000005494	TUT4
ENSOARG00000005515	PDPR
ENSOARG00000005525	MALT1
ENSOARG00000005541	ARHGEF37
ENSOARG00000005581	PPARGC1A
ENSOARG00000005603	KHDRBS2
ENSOARG00000005624	BPIFB2
ENSOARG00000005650	ARHGEF10
ENSOARG00000005701	CPLX4
ENSOARG00000005716	QPRT
ENSOARG00000005724
ENSOARG00000005733	CDK5RAP2
ENSOARG00000005740	BPIFB6
ENSOARG00000005768	ZNF397
ENSOARG00000005774	SLC9A9
ENSOARG00000005795	DTNA
ENSOARG00000005819	SOX6
ENSOARG00000005854	ADGRL3
ENSOARG00000005948
ENSOARG00000005968	CSMD1
ENSOARG00000005969
ENSOARG00000006008	KLHL14
ENSOARG00000006035
ENSOARG00000006036
ENSOARG00000006063	EIF4EBP2
ENSOARG00000006065	NODAL
ENSOARG00000006078	COL27A1
ENSOARG00000006122	GAS7
ENSOARG00000006166	MLKL
ENSOARG00000006168
ENSOARG00000006198	CPT2
ENSOARG00000006253	ANGPT2
ENSOARG00000006316	SDCCAG8
ENSOARG00000006389
ENSOARG00000006414	DIAPH3
ENSOARG00000006428	GLIS1
ENSOARG00000006431	INSRR
ENSOARG00000006458	CWC27
ENSOARG00000006460	NTRK1
ENSOARG00000006514	FRMD4A
ENSOARG00000006517	PDE3B
ENSOARG00000006544	WNT3A
ENSOARG00000006557	AKAP6
ENSOARG00000006559
ENSOARG00000006590	WNT9A
ENSOARG00000006617
ENSOARG00000006628
ENSOARG00000006632
ENSOARG00000006643	RASA2
ENSOARG00000006650	FAM83B
ENSOARG00000006662	TMC2
ENSOARG00000006673	MYO6
ENSOARG00000006683
ENSOARG00000006689
ENSOARG00000006754	PALM3
ENSOARG00000006764
ENSOARG00000006776
ENSOARG00000006780	KBTBD2
ENSOARG00000006793	TAOK1
ENSOARG00000006797	CNMD
ENSOARG00000006823	SUGT1
ENSOARG00000006827	RBM19
ENSOARG00000006830	IL27RA
ENSOARG00000006836	DPY19L4
ENSOARG00000006860	TRIM42
ENSOARG00000006894
ENSOARG00000006911
ENSOARG00000006965	RLN3
ENSOARG00000006983	LRGUK
ENSOARG00000007007	KCTD1
ENSOARG00000007060
ENSOARG00000007187	BCKDHB
ENSOARG00000007202	SPON1
ENSOARG00000007210	PDE4D
ENSOARG00000007297
ENSOARG00000007302	UBE3D
ENSOARG00000007345	FNDC8
ENSOARG00000007449	ENOX1
ENSOARG00000007455	ADCY8
ENSOARG00000007473
ENSOARG00000007498	PTH
ENSOARG00000007510	TMEM61
ENSOARG00000007527	RAD51D
ENSOARG00000007530	BSND
ENSOARG00000007555	ATP2B3
ENSOARG00000007558	GAS2
ENSOARG00000007559	PODNL1
ENSOARG00000007599
ENSOARG00000007642
ENSOARG00000007648	CCDC148
ENSOARG00000007653
ENSOARG00000007667	PRMT9
ENSOARG00000007669
ENSOARG00000007680	SLC34A2
ENSOARG00000007685	ZC2HC1A
ENSOARG00000007686	ASAP1
ENSOARG00000007705
ENSOARG00000007711	CC2D1A
ENSOARG00000007742
ENSOARG00000007745	SIAH3
ENSOARG00000007789	USP54
ENSOARG00000007791	VAT1L
ENSOARG00000007799
ENSOARG00000007805	ARL8B
ENSOARG00000007813	TRMT11
ENSOARG00000007815
ENSOARG00000007874	GATAD2A
ENSOARG00000007877	FYB2
ENSOARG00000007878	NCOA7
ENSOARG00000007892
ENSOARG00000007916	WWOX
ENSOARG00000007919
ENSOARG00000007950	STMN2
ENSOARG00000007953	TMEM184C
ENSOARG00000007960
ENSOARG00000007977	C1QB
ENSOARG00000007998	DGKB
ENSOARG00000008006	RNF217
ENSOARG00000008009	CDH17
ENSOARG00000008011	GALNT13
ENSOARG00000008053	ARL6IP6
ENSOARG00000008094	EPHB1
ENSOARG00000008132	ITPR1
ENSOARG00000008157	CABLES1
ENSOARG00000008188	ANXA6
ENSOARG00000008198	AGMO
ENSOARG00000008224	DAB1
ENSOARG00000008246	RB1
ENSOARG00000008322	TM9SF3
ENSOARG00000008330	WDR91
ENSOARG00000008336	RCBTB2
ENSOARG00000008371	GPR85
ENSOARG00000008389	ITGA8
ENSOARG00000008420	HSD17B10
ENSOARG00000008450
ENSOARG00000008453	RIBC1
ENSOARG00000008455	ESCO1
ENSOARG00000008460	BRF1
ENSOARG00000008504	LRRC72
ENSOARG00000008518	HOOK1
ENSOARG00000008539	GREB1L
ENSOARG00000008579	ZNF827
ENSOARG00000008581	SMC1A
ENSOARG00000008607	BTBD6
ENSOARG00000008635	ANKMY2
ENSOARG00000008639
ENSOARG00000008648	MTMR2
ENSOARG00000008701	RNASEH2B
ENSOARG00000008709	SORCS1
ENSOARG00000008743	CNTN4
ENSOARG00000008753
ENSOARG00000008792	C13orf42
ENSOARG00000008794
ENSOARG00000008802	SSH2
ENSOARG00000008823	FAM124A
ENSOARG00000008838	CNTN6
ENSOARG00000008854	MIGA2
ENSOARG00000008860	NFIA
ENSOARG00000008874	MTMR1
ENSOARG00000008885	NET1
ENSOARG00000008891	NTRK2
ENSOARG00000008929	RFX6
ENSOARG00000008932	ANO2
ENSOARG00000008939	WDFY2
ENSOARG00000008965	DHRS12
ENSOARG00000008971	KIF27
ENSOARG00000008984	CD3E
ENSOARG00000008988	PLCG2
ENSOARG00000008998	PATJ
ENSOARG00000009006	NSRP1
ENSOARG00000009014	KPNA5
ENSOARG00000009024	IDNK
ENSOARG00000009032	SPARC
ENSOARG00000009068	RSU1
ENSOARG00000009084	RUNX1T1
ENSOARG00000009087	ZUP1
ENSOARG00000009089	SMAD1
ENSOARG00000009130	ITGAX
ENSOARG00000009141
ENSOARG00000009163	KCNMA1
ENSOARG00000009172	CD3D
ENSOARG00000009195	PLCB1
ENSOARG00000009196
ENSOARG00000009204
ENSOARG00000009214
ENSOARG00000009229
ENSOARG00000009230	DPT
ENSOARG00000009236
ENSOARG00000009256	CD3G
ENSOARG00000009288
ENSOARG00000009301	COLEC12
ENSOARG00000009306	DOCK7
ENSOARG00000009309	NEK11
ENSOARG00000009339	SLC43A3
ENSOARG00000009360
ENSOARG00000009362	SPTY2D1
ENSOARG00000009401	PTGER4
ENSOARG00000009408	UEVLD
ENSOARG00000009409	SNX13
ENSOARG00000009414	ATP2C1
ENSOARG00000009429	FANCM
ENSOARG00000009449
ENSOARG00000009451	HS3ST5
ENSOARG00000009452	EFCAB5
ENSOARG00000009493	HDAC2
ENSOARG00000009514	CCR9
ENSOARG00000009537	DUSP5
ENSOARG00000009595	CDKAL1
ENSOARG00000009613	PIWIL4
ENSOARG00000009615	BRWD1
ENSOARG00000009630	MLLT6
ENSOARG00000009641	HDAC9
ENSOARG00000009654	TGM5
ENSOARG00000009671	GTF2H1
ENSOARG00000009677	CISD3
ENSOARG00000009688
ENSOARG00000009697	GADD45GIP1
ENSOARG00000009715	TGM7
ENSOARG00000009732	FYN
ENSOARG00000009763	PCGF2
ENSOARG00000009766	ADAMTS17
ENSOARG00000009767	HPS5
ENSOARG00000009769	TRAF3IP2
ENSOARG00000009773	RAD23A
ENSOARG00000009787	RNF41
ENSOARG00000009798	SAMD12
ENSOARG00000009831	PSMB3
ENSOARG00000009860	ROR1
ENSOARG00000009870	CALR
ENSOARG00000009874	KCTD9
ENSOARG00000009889	GNRH1
ENSOARG00000009905	MBOAT1
ENSOARG00000009918	DOCK5
ENSOARG00000009924	ANXA11
ENSOARG00000009929	SLC45A1
ENSOARG00000009949	SKAP2
ENSOARG00000009954
ENSOARG00000009960	PAK5
ENSOARG00000009973	EMILIN2
ENSOARG00000009979	DSCAM
ENSOARG00000009984	PLAC9
ENSOARG00000010026	ADAM28
ENSOARG00000010049
ENSOARG00000010080	SULF2
ENSOARG00000010081	LPIN2
ENSOARG00000010095	PIGU
ENSOARG00000010097	CLCN5
ENSOARG00000010136	EXOSC1
ENSOARG00000010152	ANKEF1
ENSOARG00000010155	RNF144B
ENSOARG00000010187	WDR70
ENSOARG00000010191	PEBP4
ENSOARG00000010220	ZDHHC16
ENSOARG00000010268	SNAP25
ENSOARG00000010286	DNAJC6
ENSOARG00000010312	TSPAN14
ENSOARG00000010313	TBRG1
ENSOARG00000010317	MKKS
ENSOARG00000010357	PIWIL2
ENSOARG00000010368
ENSOARG00000010370	SLX4IP
ENSOARG00000010384	PHYHIP
ENSOARG00000010405	BMP1
ENSOARG00000010431	CPLANE1
ENSOARG00000010436	MMS19
ENSOARG00000010437	DLGAP1
ENSOARG00000010444	CHRDL2
ENSOARG00000010452
ENSOARG00000010466	CLIC5
ENSOARG00000010473	EPB41L3
ENSOARG00000010496	OSBPL3
ENSOARG00000010535
ENSOARG00000010555	STMN3
ENSOARG00000010584	RNF169
ENSOARG00000010622	YIPF4
ENSOARG00000010627	NBEA
ENSOARG00000010642	GFRA2
ENSOARG00000010646
ENSOARG00000010682	PACSIN1
ENSOARG00000010710	CALN1
ENSOARG00000010736	GSDME
ENSOARG00000010739	UPF1
ENSOARG00000010742	AGBL1
ENSOARG00000010747	SYP
ENSOARG00000010762
ENSOARG00000010765	UAP1
ENSOARG00000010768	AFG1L
ENSOARG00000010788	R3HDM1
ENSOARG00000010797
ENSOARG00000010801	PRICKLE3
ENSOARG00000010808	TEAD4
ENSOARG00000010833
ENSOARG00000010857	ZBTB7A
ENSOARG00000010859
ENSOARG00000010890
ENSOARG00000010894	MAGIX
ENSOARG00000010915	NPY
ENSOARG00000010917	PDS5B
ENSOARG00000010930	CDCP1
ENSOARG00000010940
ENSOARG00000010952	ARHGEF6
ENSOARG00000010969	GPAM
ENSOARG00000010988	PIAS4
ENSOARG00000010998	COL15A1
ENSOARG00000011082	GABBR2
ENSOARG00000011088
ENSOARG00000011090	TRDMT1
ENSOARG00000011093
ENSOARG00000011098	PDP2
ENSOARG00000011108
ENSOARG00000011125	RBM6
ENSOARG00000011139	RNF141
ENSOARG00000011146	PADI2
ENSOARG00000011151	NRIP2
ENSOARG00000011164
ENSOARG00000011181
ENSOARG00000011187	ADD2
ENSOARG00000011188	MYH7B
ENSOARG00000011193	FOXE1
ENSOARG00000011227
ENSOARG00000011237
ENSOARG00000011253	HAPLN3
ENSOARG00000011256	ITFG2
ENSOARG00000011260	MFGE8
ENSOARG00000011270	ZFYVE27
ENSOARG00000011279	PHF13
ENSOARG00000011315	SPEF2
ENSOARG00000011317	CCDC180
ENSOARG00000011331	PREP
ENSOARG00000011340	MMP16
ENSOARG00000011342	ARRB1
ENSOARG00000011354	KLHL21
ENSOARG00000011408	FRY
ENSOARG00000011426	ZBTB48
ENSOARG00000011442	OFD1
ENSOARG00000011448	SLC2A4
ENSOARG00000011475	CNBD1
ENSOARG00000011482	GRHPR
ENSOARG00000011494
ENSOARG00000011497
ENSOARG00000011499
ENSOARG00000011501	GRIK2
ENSOARG00000011555
ENSOARG00000011562	YBX2
ENSOARG00000011583	TGFB2
ENSOARG00000011588	BIRC7
ENSOARG00000011601	R3HCC1L
ENSOARG00000011614
ENSOARG00000011616
ENSOARG00000011627	ASCC3
ENSOARG00000011633	TTC23L
ENSOARG00000011639	YTHDF1
ENSOARG00000011650	TMC7
ENSOARG00000011661	SORCS2
ENSOARG00000011668	SBF2
ENSOARG00000011692	LOXL4
ENSOARG00000011695	TRPC4AP
ENSOARG00000011719	LRRC7
ENSOARG00000011766	CDCA7L
ENSOARG00000011775	PRDM13
ENSOARG00000011780	ACTR3
ENSOARG00000011798	INPP4B
ENSOARG00000011846	NTN4
ENSOARG00000011847
ENSOARG00000011869	AMACR
ENSOARG00000011885	DPP10
ENSOARG00000011902	SLC45A2
ENSOARG00000011922	FAXC
ENSOARG00000011936	TRDV3
ENSOARG00000011950
ENSOARG00000011953	FANK1
ENSOARG00000011971	UBL3
ENSOARG00000011980
ENSOARG00000011990	MMS22L
ENSOARG00000011993	ADAMTS12
ENSOARG00000012004
ENSOARG00000012013	MMP24
ENSOARG00000012033	OPN5
ENSOARG00000012051	MTUS2
ENSOARG00000012075	CDON
ENSOARG00000012085	TARS
ENSOARG00000012106	PIP5K1C
ENSOARG00000012113	UFL1
ENSOARG00000012147	NPR3
ENSOARG00000012148	MANEA
ENSOARG00000012172	ZNF330
ENSOARG00000012174	EIF6
ENSOARG00000012203
ENSOARG00000012221	PDS5A
ENSOARG00000012241	ADAM12
ENSOARG00000012242	FAM83C
ENSOARG00000012245	MTMR12
ENSOARG00000012269	UQCC1
ENSOARG00000012284	NIPAL4
ENSOARG00000012294	C11orf65
ENSOARG00000012312	GOLPH3
ENSOARG00000012321	MAP3K7
ENSOARG00000012336	TLE4
ENSOARG00000012356	WNK1
ENSOARG00000012360	ELK3
ENSOARG00000012361	BACH2
ENSOARG00000012373	ADAM19
ENSOARG00000012388
ENSOARG00000012403	FAM207A
ENSOARG00000012407	ERICH3
ENSOARG00000012441	RMDN1
ENSOARG00000012446
ENSOARG00000012452	ADARB1
ENSOARG00000012484	PRUNE2
ENSOARG00000012515	PCSK5
ENSOARG00000012535	TNS3
ENSOARG00000012539
ENSOARG00000012552	OSTF1
ENSOARG00000012565	YPEL2
ENSOARG00000012585
ENSOARG00000012595
ENSOARG00000012602	NUP42
ENSOARG00000012632	DHX40
ENSOARG00000012668	ANKRD6
ENSOARG00000012670	SLC26A8
ENSOARG00000012697
ENSOARG00000012707	MRPS6
ENSOARG00000012714	DDX10
ENSOARG00000012723	MSH4
ENSOARG00000012729
ENSOARG00000012741	MAPKAP1
ENSOARG00000012755	GDA
ENSOARG00000012784	HTRA3
ENSOARG00000012787	UXT
ENSOARG00000012788	CLINT1
ENSOARG00000012806	CDH12
ENSOARG00000012819	ELK1
ENSOARG00000012824	GRPR
ENSOARG00000012875	BLM
ENSOARG00000012908
ENSOARG00000012935	AK5
ENSOARG00000012949	C9orf135
ENSOARG00000012969	SLC24A4
ENSOARG00000012973	RALB
ENSOARG00000012999	ZC3H12C
ENSOARG00000013013	SYN1
ENSOARG00000013062	SETD7
ENSOARG00000013075	PIP5K1B
ENSOARG00000013089	CACNA1C
ENSOARG00000013116	CA3
ENSOARG00000013146	IL12B
ENSOARG00000013157	TIMP1
ENSOARG00000013158	SPDYC
ENSOARG00000013216	PCDH15
ENSOARG00000013259	FUBP1
ENSOARG00000013286	RDX
ENSOARG00000013324
ENSOARG00000013377	DIP2A
ENSOARG00000013378	GLIS3
ENSOARG00000013442
ENSOARG00000013452	MITD1
ENSOARG00000013499	ULK1
ENSOARG00000013551	ARHGAP20
ENSOARG00000013579
ENSOARG00000013596	COBL
ENSOARG00000013597	PSMB7
ENSOARG00000013606	ATP10B
ENSOARG00000013609
ENSOARG00000013623	PPP3CA
ENSOARG00000013625	PRKG1
ENSOARG00000013658	TBC1D7
ENSOARG00000013661	NEK6
ENSOARG00000013674	RBM10
ENSOARG00000013726	AGK
ENSOARG00000013755	PTPRD
ENSOARG00000013756	ARHGAP12
ENSOARG00000013769
ENSOARG00000013775
ENSOARG00000013817	RGN
ENSOARG00000013822
ENSOARG00000013850	CRB2
ENSOARG00000013851	UNC79
ENSOARG00000013861	MPDZ
ENSOARG00000013887	NFIB
ENSOARG00000013915	DENND11
ENSOARG00000013939	GLB1L3
ENSOARG00000013985
ENSOARG00000014001	GABRG2
ENSOARG00000014002	PSIP1
ENSOARG00000014022
ENSOARG00000014058	LPAR3
ENSOARG00000014065	C11orf16
ENSOARG00000014107	ZNF438
ENSOARG00000014155	H1FOO
ENSOARG00000014158	AKIP1
ENSOARG00000014168	ASB2
ENSOARG00000014186
ENSOARG00000014200
ENSOARG00000014227	SUCO
ENSOARG00000014232	SERPINF1
ENSOARG00000014255	BOP1
ENSOARG00000014265
ENSOARG00000014279	RHO
ENSOARG00000014284	GLB1L2
ENSOARG00000014312	AJAP1
ENSOARG00000014319	DDAH1
ENSOARG00000014327	OTUB2
ENSOARG00000014337	DPF2
ENSOARG00000014341	DDX24
ENSOARG00000014343	SMYD4
ENSOARG00000014404	TTLL11
ENSOARG00000014407
ENSOARG00000014418	GRK4
ENSOARG00000014440	VNN1
ENSOARG00000014448	SIK2
ENSOARG00000014459	RDH8
ENSOARG00000014461	COL24A1
ENSOARG00000014470	IFT122
ENSOARG00000014484
ENSOARG00000014485	MTRR
ENSOARG00000014505
ENSOARG00000014516	NOP14
ENSOARG00000014535	TRAM2
ENSOARG00000014548
ENSOARG00000014549	ODF2L
ENSOARG00000014575
ENSOARG00000014585
ENSOARG00000014588
ENSOARG00000014594
ENSOARG00000014615
ENSOARG00000014624	PPP2R1B
ENSOARG00000014650	HGH1
ENSOARG00000014651	MOB3B
ENSOARG00000014661	RNF144A
ENSOARG00000014670
ENSOARG00000014686	TPH2
ENSOARG00000014701
ENSOARG00000014702	ADCY2
ENSOARG00000014745	PAPPA2
ENSOARG00000014748
ENSOARG00000014773
ENSOARG00000014877	ADAMTS5
ENSOARG00000014899	ZDHHC17
ENSOARG00000014903	GRM3
ENSOARG00000014916	CSRP2
ENSOARG00000014926	ADGRD1
ENSOARG00000014930	SMAD5
ENSOARG00000014951	PLAG1
ENSOARG00000014964
ENSOARG00000014967	AHI1
ENSOARG00000014996	NAV3
ENSOARG00000015005
ENSOARG00000015027	SYT1
ENSOARG00000015058	SH3KBP1
ENSOARG00000015081	TGFBI
ENSOARG00000015124	PTPRQ
ENSOARG00000015136	KLHL1
ENSOARG00000015197	MED10
ENSOARG00000015209
ENSOARG00000015212	GLO1
ENSOARG00000015218
ENSOARG00000015285	TMTC2
ENSOARG00000015286	SEMA3A
ENSOARG00000015313	SPOCK1
ENSOARG00000015354
ENSOARG00000015370	KLHL3
ENSOARG00000015375	ERC2
ENSOARG00000015419
ENSOARG00000015446	ADAMTS16
ENSOARG00000015462	COQ10B
ENSOARG00000015472	C3H12orf29
ENSOARG00000015476	HSPD1
ENSOARG00000015513	KLF12
ENSOARG00000015531	CEP290
ENSOARG00000015551	MAP1S
ENSOARG00000015555	NCAM2
ENSOARG00000015576
ENSOARG00000015585
ENSOARG00000015650	DPYS
ENSOARG00000015655	OCA2
ENSOARG00000015774	DIP2C
ENSOARG00000015807	UNC13A
ENSOARG00000015828
ENSOARG00000015870	PAH
ENSOARG00000015926	TEX11
ENSOARG00000015973	RASAL2
ENSOARG00000015979	RIMS2
ENSOARG00000015980	NR5A2
ENSOARG00000016016	VEZT
ENSOARG00000016042	THY1
ENSOARG00000016052	AOX1
ENSOARG00000016064
ENSOARG00000016116	KIF14
ENSOARG00000016123	SEPTIN6
ENSOARG00000016138	CD5
ENSOARG00000016153	CPE
ENSOARG00000016168	TRIB2
ENSOARG00000016172
ENSOARG00000016187	FNIP1
ENSOARG00000016264	VPS37C
ENSOARG00000016291
ENSOARG00000016292	CACNA2D1
ENSOARG00000016295	NECTIN1
ENSOARG00000016310	RPAP2
ENSOARG00000016347	RAP1GDS1
ENSOARG00000016372	ART3
ENSOARG00000016384	CDK14
ENSOARG00000016403
ENSOARG00000016420
ENSOARG00000016456	CLVS1
ENSOARG00000016492	AMHR2
ENSOARG00000016514	SP1
ENSOARG00000016515	CNIH3
ENSOARG00000016523	CAMSAP2
ENSOARG00000016527	TDG
ENSOARG00000016547	CALCRL
ENSOARG00000016571
ENSOARG00000016578	VSNL1
ENSOARG00000016594	ASPH
ENSOARG00000016595	TMEM132D
ENSOARG00000016611	CXCL10
ENSOARG00000016640	GLT8D2
ENSOARG00000016641
ENSOARG00000016652	PCNX3
ENSOARG00000016654	LYRM7
ENSOARG00000016659	DCHS1
ENSOARG00000016670
ENSOARG00000016685	CCDC18
ENSOARG00000016687	KIF6
ENSOARG00000016695	MVB12A
ENSOARG00000016749
ENSOARG00000016757	MINAR2
ENSOARG00000016786	KRT8
ENSOARG00000016796
ENSOARG00000016818	POC5
ENSOARG00000016819	POU2F3
ENSOARG00000016825	ADAMTS19
ENSOARG00000016880	OSR1
ENSOARG00000016884	CACNA1I
ENSOARG00000016899	TMEM132C
ENSOARG00000016920
ENSOARG00000016923	PCSK2
ENSOARG00000016924	ZNF385B
ENSOARG00000016935	BCAR3
ENSOARG00000016967	KLHL15
ENSOARG00000016968	C11orf87
ENSOARG00000016997
ENSOARG00000017013	PAIP2
ENSOARG00000017014	CLDN25
ENSOARG00000017023	C11orf71
ENSOARG00000017027	ENTHD1
ENSOARG00000017032	OR2I1P
ENSOARG00000017050	SLC27A6
ENSOARG00000017065	SLC23A1
ENSOARG00000017072	TRPV5
ENSOARG00000017094	MZB1
ENSOARG00000017102
ENSOARG00000017118
ENSOARG00000017152	ASCL3
ENSOARG00000017168
ENSOARG00000017189	FBN2
ENSOARG00000017191	SIPA1
ENSOARG00000017193	ARHGAP29
ENSOARG00000017200
ENSOARG00000017206	CFAP46
ENSOARG00000017222	FGF2
ENSOARG00000017240	HECW1
ENSOARG00000017251
ENSOARG00000017260	SMIM33
ENSOARG00000017265	TMEM173
ENSOARG00000017279	NLK
ENSOARG00000017295	HOMER1
ENSOARG00000017349
ENSOARG00000017375	HIPK3
ENSOARG00000017386	TRIM27
ENSOARG00000017426	RELA
ENSOARG00000017434	CMYA5
ENSOARG00000017474	JUP
ENSOARG00000017475	INHBA
ENSOARG00000017489	AACS
ENSOARG00000017497	KLHL29
ENSOARG00000017505	SUGCT
ENSOARG00000017507	TMPRSS12
ENSOARG00000017524	MAGI2
ENSOARG00000017547	USHBP1
ENSOARG00000017554	UBR5
ENSOARG00000017568	SSH1
ENSOARG00000017574	POLA1
ENSOARG00000017603
ENSOARG00000017613	SLC12A2
ENSOARG00000017630	NR2F6
ENSOARG00000017693
ENSOARG00000017698	POU6F2
ENSOARG00000017709	CAST
ENSOARG00000017717	SPG21
ENSOARG00000017721	OCEL1
ENSOARG00000017731	MTFMT
ENSOARG00000017760	CCDC192
ENSOARG00000017766	PRRC1
ENSOARG00000017767
ENSOARG00000017786	USE1
ENSOARG00000017797	FRYL
ENSOARG00000017815
ENSOARG00000017825	SGK3
ENSOARG00000017856	MEGF10
ENSOARG00000017917	GRIK4
ENSOARG00000017919	SHTN1
ENSOARG00000017939	FTO
ENSOARG00000017994	LNPEP
ENSOARG00000018014	RRM2B
ENSOARG00000018023	SLC16A2
ENSOARG00000018027	IRX6
ENSOARG00000018039	BMP7
ENSOARG00000018080
ENSOARG00000018100	LIX1
ENSOARG00000018113	MEGF11
ENSOARG00000018116	AQP6
ENSOARG00000018126	IRS4
ENSOARG00000018150	SLC6A2
ENSOARG00000018158
ENSOARG00000018161
ENSOARG00000018163	RGMB
ENSOARG00000018171	AQP5
ENSOARG00000018185	MAP2K1
ENSOARG00000018198	SNAPC5
ENSOARG00000018207
ENSOARG00000018208	PHAX
ENSOARG00000018220	CPED1
ENSOARG00000018225	ZWILCH
ENSOARG00000018233
ENSOARG00000018246	PHF5A
ENSOARG00000018252	SLC18A2
ENSOARG00000018268
ENSOARG00000018272	ZW10
ENSOARG00000018277	CD28
ENSOARG00000018279	LARGE1
ENSOARG00000018288	NCKAP5L
ENSOARG00000018314	AGXT
ENSOARG00000018328	IQCH
ENSOARG00000018337	CPAMD8
ENSOARG00000018344	ALDH7A1
ENSOARG00000018353	MAP2K5
ENSOARG00000018354
ENSOARG00000018389	GSAP
ENSOARG00000018428
ENSOARG00000018444	PDZD8
ENSOARG00000018454	ABTB2
ENSOARG00000018504	TPK1
ENSOARG00000018532
ENSOARG00000018543	NSFL1C
ENSOARG00000018561
ENSOARG00000018572	CDK6
ENSOARG00000018580	AASS
ENSOARG00000018589
ENSOARG00000018604	GLCE
ENSOARG00000018623	ZNF608
ENSOARG00000018689	NUP93
ENSOARG00000018695	TLE3
ENSOARG00000018722	HDAC4
ENSOARG00000018732	UACA
ENSOARG00000018754
ENSOARG00000018765	LRRC49
ENSOARG00000018784
ENSOARG00000018811	VAV3
ENSOARG00000018832	IL4R
ENSOARG00000018871	CD47
ENSOARG00000018902
ENSOARG00000018918	SNX24
ENSOARG00000018930	HEXA
ENSOARG00000018940	SCLY
ENSOARG00000018967	CACNG2
ENSOARG00000019061	EPS15L1
ENSOARG00000019101	MAP2
ENSOARG00000019122
ENSOARG00000019177
ENSOARG00000019188	IPO4
ENSOARG00000019194	REC8
ENSOARG00000019201	IRF9
ENSOARG00000019206	PHLDB2
ENSOARG00000019208	C1QTNF6
ENSOARG00000019256
ENSOARG00000019257
ENSOARG00000019288	ASB8
ENSOARG00000019300	PFKM
ENSOARG00000019335
ENSOARG00000019379	BICD1
ENSOARG00000019388	CSMD2
ENSOARG00000019392	PRMT5
ENSOARG00000019398	RBM23
ENSOARG00000019399	GPN1
ENSOARG00000019403	REM2
ENSOARG00000019406	LRP10
ENSOARG00000019410	SUPT7L
ENSOARG00000019414	MMP14
ENSOARG00000019433	SLC16A4
ENSOARG00000019434	SLC4A1AP
ENSOARG00000019446
ENSOARG00000019448	TRDC
ENSOARG00000019556	CCDC191
ENSOARG00000019565
ENSOARG00000019622	NELL2
ENSOARG00000019645	TMEM117
ENSOARG00000019648	INKA2
ENSOARG00000019717	ADAMTS20
ENSOARG00000019720	TMEM185B
ENSOARG00000019784	AAK1
ENSOARG00000019818	MAGI3
ENSOARG00000019841	PHTF1
ENSOARG00000019842
ENSOARG00000019845
ENSOARG00000019846
ENSOARG00000019849	GKN1
ENSOARG00000019900	FSTL1
ENSOARG00000019904	NDUFB4
ENSOARG00000019919
ENSOARG00000019930
ENSOARG00000019977	STXBP5L
ENSOARG00000019998	SLC2A13
ENSOARG00000019999	KRAS
ENSOARG00000020009	POLQ
ENSOARG00000020017	MEIS2
ENSOARG00000020021	CASC1
ENSOARG00000020044	RASGRP1
ENSOARG00000020046
ENSOARG00000020108	EHBP1
ENSOARG00000020111	PTPRR
ENSOARG00000020167	SLC49A4
ENSOARG00000020178	ST8SIA1
ENSOARG00000020184	PENK
ENSOARG00000020301
ENSOARG00000020304
ENSOARG00000020330	EXD1
ENSOARG00000020336	CHP1
ENSOARG00000020346
ENSOARG00000020361	RTF1
ENSOARG00000020362
ENSOARG00000020376	TBX15
ENSOARG00000020379	RPAP1
ENSOARG00000020387	TYRO3
ENSOARG00000020391	AP1S3
ENSOARG00000020418	MAPKBP1
ENSOARG00000020428	DNAH6
ENSOARG00000020434
ENSOARG00000020437	DOCK10
ENSOARG00000020442	NOTCH2
ENSOARG00000020484	LPP
ENSOARG00000020543	DGKG
ENSOARG00000020558
ENSOARG00000020567	AGFG1
ENSOARG00000020570	ATOH8
ENSOARG00000020571	TTBK2
ENSOARG00000020593	PID1
ENSOARG00000020608	DNER
ENSOARG00000020610	STRAP
ENSOARG00000020691	TRIM9
ENSOARG00000020719	TBL1XR1
ENSOARG00000020722	NAALADL2
ENSOARG00000020732	SPATA16
ENSOARG00000020737	NCEH1
ENSOARG00000020750	SMYD1
ENSOARG00000020752	FABP1
ENSOARG00000020754	OTUD7B
ENSOARG00000020772	ANP32E
ENSOARG00000020783	C1orf54
ENSOARG00000020795	CIART
ENSOARG00000020796	MRPS21
ENSOARG00000020867	CGNL1
ENSOARG00000020878	MNS1
ENSOARG00000020882	TEX9
ENSOARG00000020893	PRTG
ENSOARG00000020895	PYGO1
ENSOARG00000020899	DNAAF4
ENSOARG00000020918	UNC13C
ENSOARG00000021065
ENSOARG00000021066	THEM5
ENSOARG00000021091	FBXO34
ENSOARG00000021104
ENSOARG00000021117	DAAM1
ENSOARG00000021131	MNAT1
ENSOARG00000021134
ENSOARG00000021141	KCNH5
ENSOARG00000021142	RHOJ
ENSOARG00000021162	GPHN
ENSOARG00000021200	RGS6
ENSOARG00000021206
ENSOARG00000021212	SNORD113-9
ENSOARG00000021274
ENSOARG00000021329	U6
ENSOARG00000021366	U6
ENSOARG00000021441	U3
ENSOARG00000021494
ENSOARG00000021527	U6
ENSOARG00000021569	SNORD113-2
ENSOARG00000021668
ENSOARG00000021803
ENSOARG00000021833	U4
ENSOARG00000021864	U6
ENSOARG00000021895	U6
ENSOARG00000021918	5S_rRNA
ENSOARG00000021934
ENSOARG00000021938	5S_rRNA
ENSOARG00000021955
ENSOARG00000021982	Vault
ENSOARG00000021989
ENSOARG00000022004
ENSOARG00000022023	U6
ENSOARG00000022038	U6
ENSOARG00000022110
ENSOARG00000022115	SNORD113-6
ENSOARG00000022143
ENSOARG00000022161
ENSOARG00000022178
ENSOARG00000022202
ENSOARG00000022309	SNORD113-8
ENSOARG00000022332
ENSOARG00000022352
ENSOARG00000022397
ENSOARG00000022425	7SK
ENSOARG00000022454	U6
ENSOARG00000022471	U6
ENSOARG00000022528
ENSOARG00000022559
ENSOARG00000022567
ENSOARG00000022585	U6
ENSOARG00000022661	SNORD16
ENSOARG00000022742
ENSOARG00000022755
ENSOARG00000022773	U5
ENSOARG00000022784
ENSOARG00000022825
ENSOARG00000022839	SNORD18
ENSOARG00000022868
ENSOARG00000022926	MIR874
ENSOARG00000022938	oar-mir-133
ENSOARG00000022974
ENSOARG00000023008	U6
ENSOARG00000023046
ENSOARG00000023142	Vault
ENSOARG00000023212
ENSOARG00000023215	U6
ENSOARG00000023232
ENSOARG00000023256
ENSOARG00000023427	U6
ENSOARG00000023493	U6
ENSOARG00000023512
ENSOARG00000023537	5S_rRNA
ENSOARG00000023540
ENSOARG00000023570
ENSOARG00000023637
ENSOARG00000023737
ENSOARG00000023744
ENSOARG00000023753	U6
ENSOARG00000023762
ENSOARG00000023764	SNORD113-7
ENSOARG00000023851	U6
ENSOARG00000023855	U6
ENSOARG00000023887
ENSOARG00000023908	U6
ENSOARG00000023930	U6
ENSOARG00000024066	SNORD113-4
ENSOARG00000024204	5S_rRNA
ENSOARG00000024214
ENSOARG00000024283	U5
ENSOARG00000024310	SNORD18
ENSOARG00000024352	MIR490
ENSOARG00000024356	U1
ENSOARG00000024434
ENSOARG00000024477	MIR340
ENSOARG00000024494
ENSOARG00000024495
ENSOARG00000024496
ENSOARG00000024516	U6
ENSOARG00000024527	SNORA72
ENSOARG00000024542	5S_rRNA
ENSOARG00000024599	U6
ENSOARG00000024600	7SK
ENSOARG00000024706
ENSOARG00000024758	U6
ENSOARG00000024792
ENSOARG00000024799
ENSOARG00000024826	7SK
ENSOARG00000024836	SNORD18
ENSOARG00000024875
ENSOARG00000024885
ENSOARG00000024907	SNORA70
ENSOARG00000024980
ENSOARG00000025175	TOB2
ENSOARG00000025183
ENSOARG00000025202
ENSOARG00000025215
ENSOARG00000025221
ENSOARG00000025222
ENSOARG00000025223
ENSOARG00000025230
ENSOARG00000025264
ENSOARG00000025265
ENSOARG00000025266
ENSOARG00000025278
ENSOARG00000025279
ENSOARG00000025281
ENSOARG00000025282
ENSOARG00000025331
ENSOARG00000025353
ENSOARG00000025375
ENSOARG00000025384
ENSOARG00000025437
ENSOARG00000025438
ENSOARG00000025449
ENSOARG00000025488
ENSOARG00000025489
ENSOARG00000025494
ENSOARG00000025530
ENSOARG00000025536
ENSOARG00000025554
ENSOARG00000025676
ENSOARG00000025678
ENSOARG00000025698
ENSOARG00000025737
ENSOARG00000025741
ENSOARG00000025760
ENSOARG00000025762
ENSOARG00000025763
ENSOARG00000025765
ENSOARG00000025773
ENSOARG00000025852
ENSOARG00000025922
ENSOARG00000025957
ENSOARG00000025958
ENSOARG00000025975
ENSOARG00000025996
ENSOARG00000026069
ENSOARG00000026070
ENSOARG00000026095
ENSOARG00000026109
ENSOARG00000026117
ENSOARG00000026151
ENSOARG00000026204
ENSOARG00000026240
ENSOARG00000026243
ENSOARG00000026245
ENSOARG00000026273
ENSOARG00000026274
ENSOARG00000026288
ENSOARG00000026292
ENSOARG00000026305
ENSOARG00000026306
ENSOARG00000026307
ENSOARG00000026308
ENSOARG00000026331
ENSOARG00000026349
ENSOARG00000026409
ENSOARG00000026415
ENSOARG00000026433
ENSOARG00000026453
ENSOARG00000026491
ENSOARG00000026494
ENSOARG00000026528
ENSOARG00000026582
ENSOARG00000026614
ENSOARG00000026620
ENSOARG00000026653
ENSOARG00000026682
ENSOARG00000026686
ENSOARG00000026687
ENSOARG00000026695
ENSOARG00000026696
ENSOARG00000026713
ENSOARG00000026732
ENSOARG00000026736
ENSOARG00000026749
ENSOARG00000026777
ENSOARG00000026778
ENSOARG00000026782
ENSOARG00000026793
ENSOARG00000026810
ENSOARG00000026819
ENSOARG00000026822
ENSOARG00000026842
ENSOARG00000026845
ENSOARG00000026850
ENSOARG00000026872
ENSOARG00000026875
ENSOARG00000026891
ENSOARG00000026909
ENSOARG00000026955
ENSOARG00000026969
ENSOARG00000026984
ENSOARG00000027021
ENSOARG00000027047

[truncated: 5 more sheets: Table S11, Table S12, Table S13, Table S14, Table S15]
